# Supplementary material for: Copper-catalyzed one-pot synthesis of glycosylated iminocoumarins and 3-triazolyl-2-iminocoumarins
Source: Royal Society of Chemistry journal article supplement (doi:10.1039/c3ra46844e), 2013-12-18
Supplement: c3ra46844e.pdf [file c3ra46844e.pdf]

## Supporting Information

### Copper-Catalyzed One-Pot Synthesis of Glycosylated Iminocoumarins and 3-Triazolyl-2-Iminocoumarins

Pintu Kumar Mandal<sup>\*,†</sup>

*Medicinal and Process Chemistry Division,<sup>†</sup> CSIR-Central Drug Research Institute, BS-10/1, Sector 10, Jankipuram extension, Sitapur  
Road, P.O. Box 173, Lucknow, 226 031, India*

*\*Email: pintuchem06@gmail.com*

Tel.: +91-522-2772450 xtn 4657; fax: +91 522 2623405

#### **Contents**

#### **Page No.**

**Copies of <sup>1</sup>H and <sup>13</sup>C NMR Spectra of the propargyl glucoside (1a) and Glycosylate diminocoumarins (5a-x), Glycosylated 3-Triazolyl-2-iminocoumarins (6a-o)**

**S2-S41**

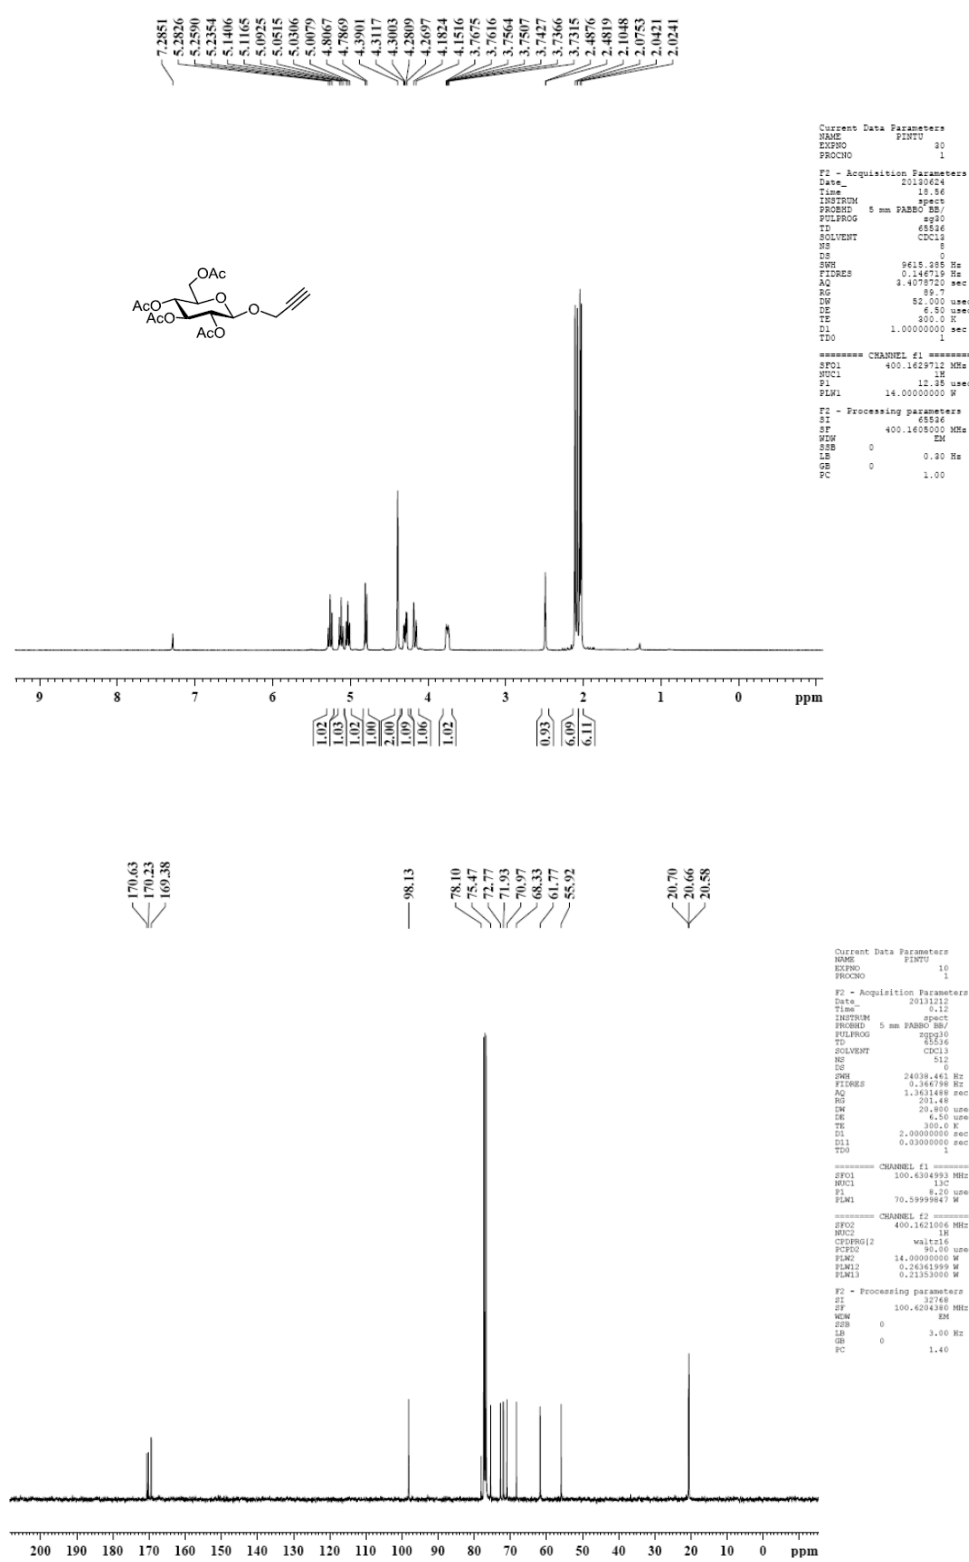

<sup>1</sup>H and <sup>13</sup>C NMR spectra of compound **1a**

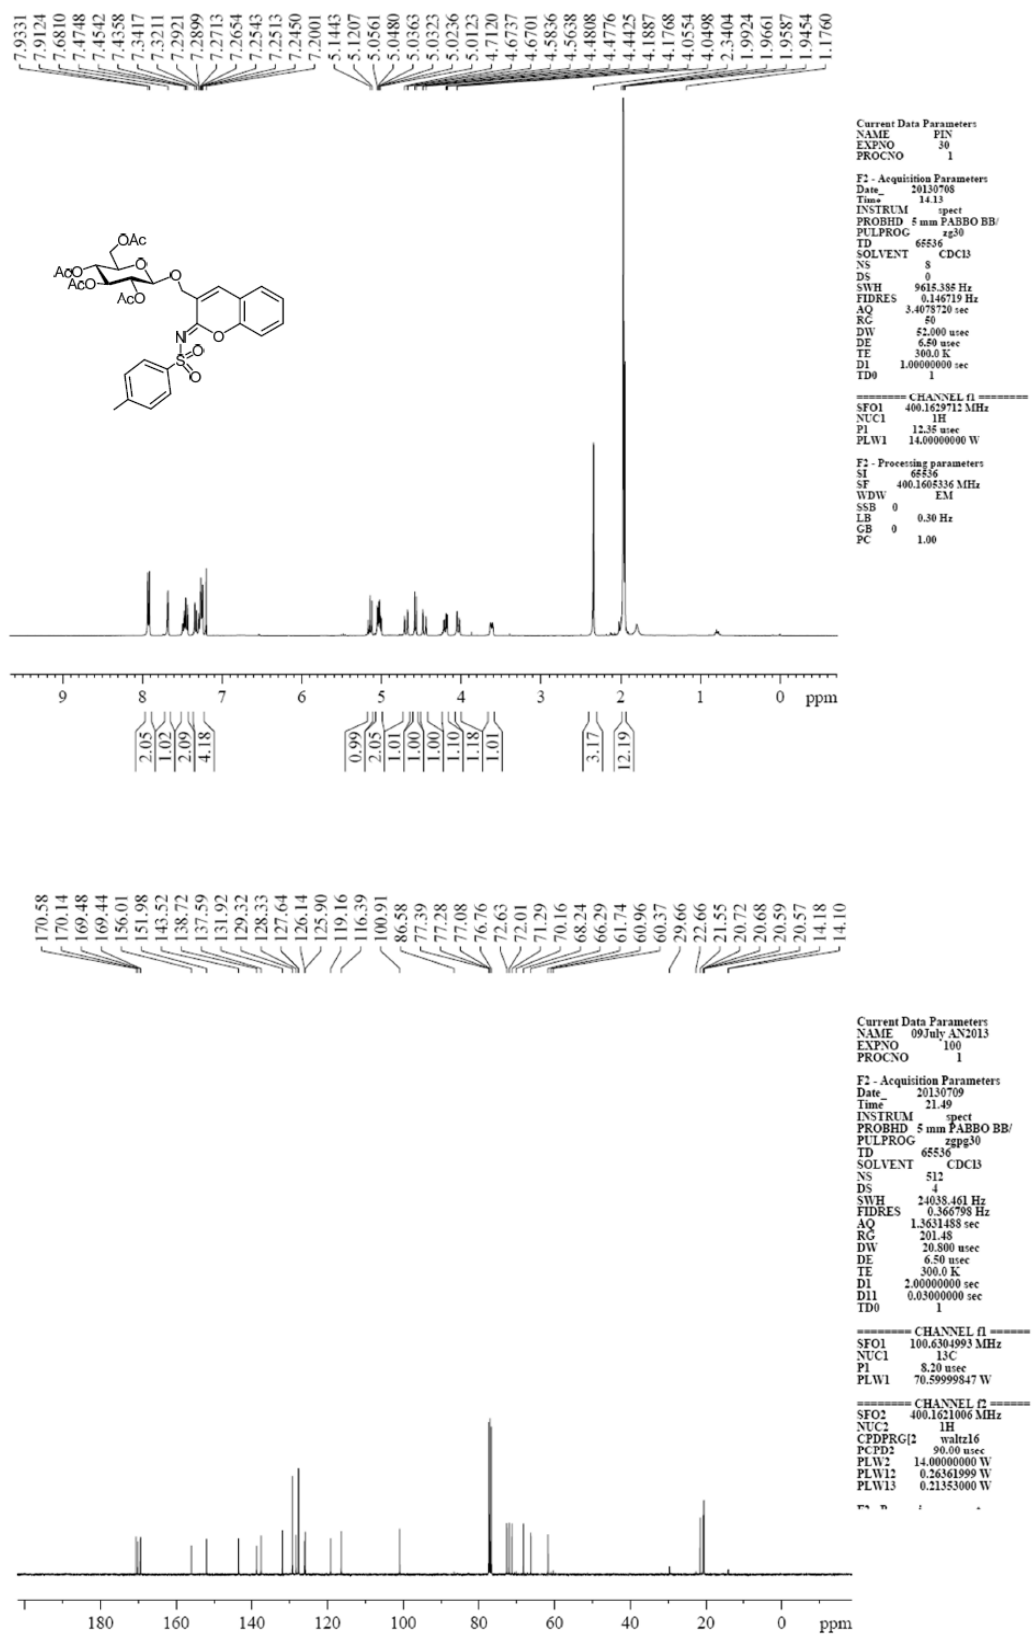

<sup>1</sup>H and <sup>13</sup>C NMR spectra of compound **5a**

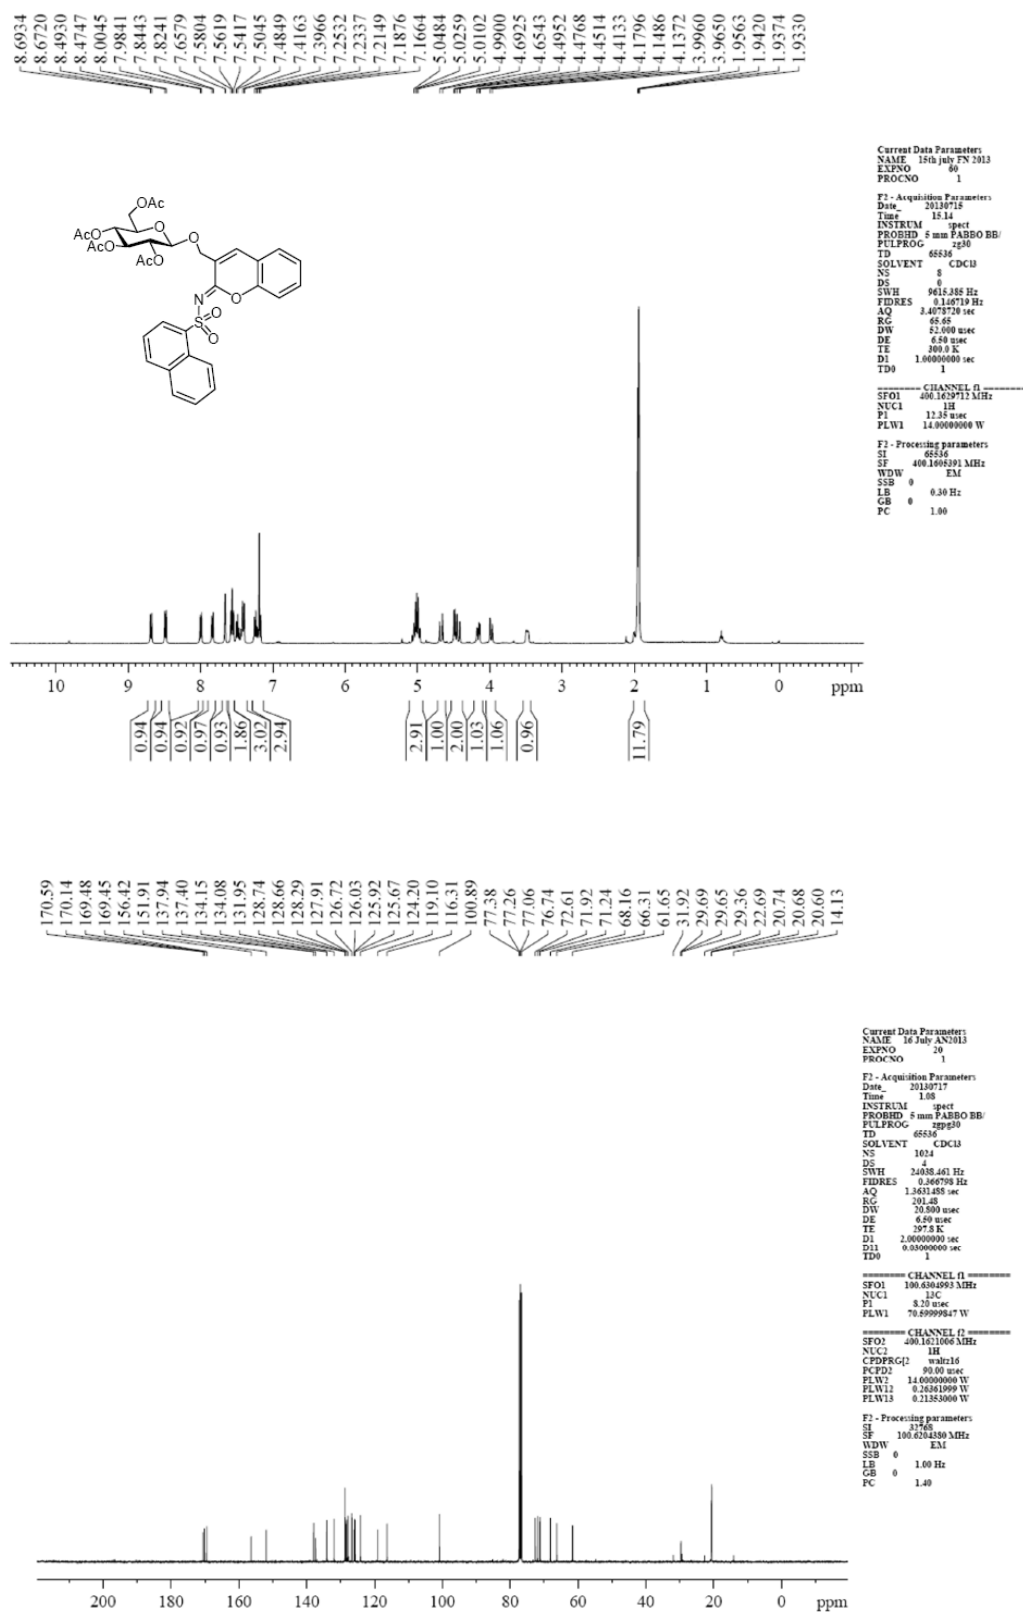

<sup>1</sup>H and <sup>13</sup>C NMR spectra of compound **5b**



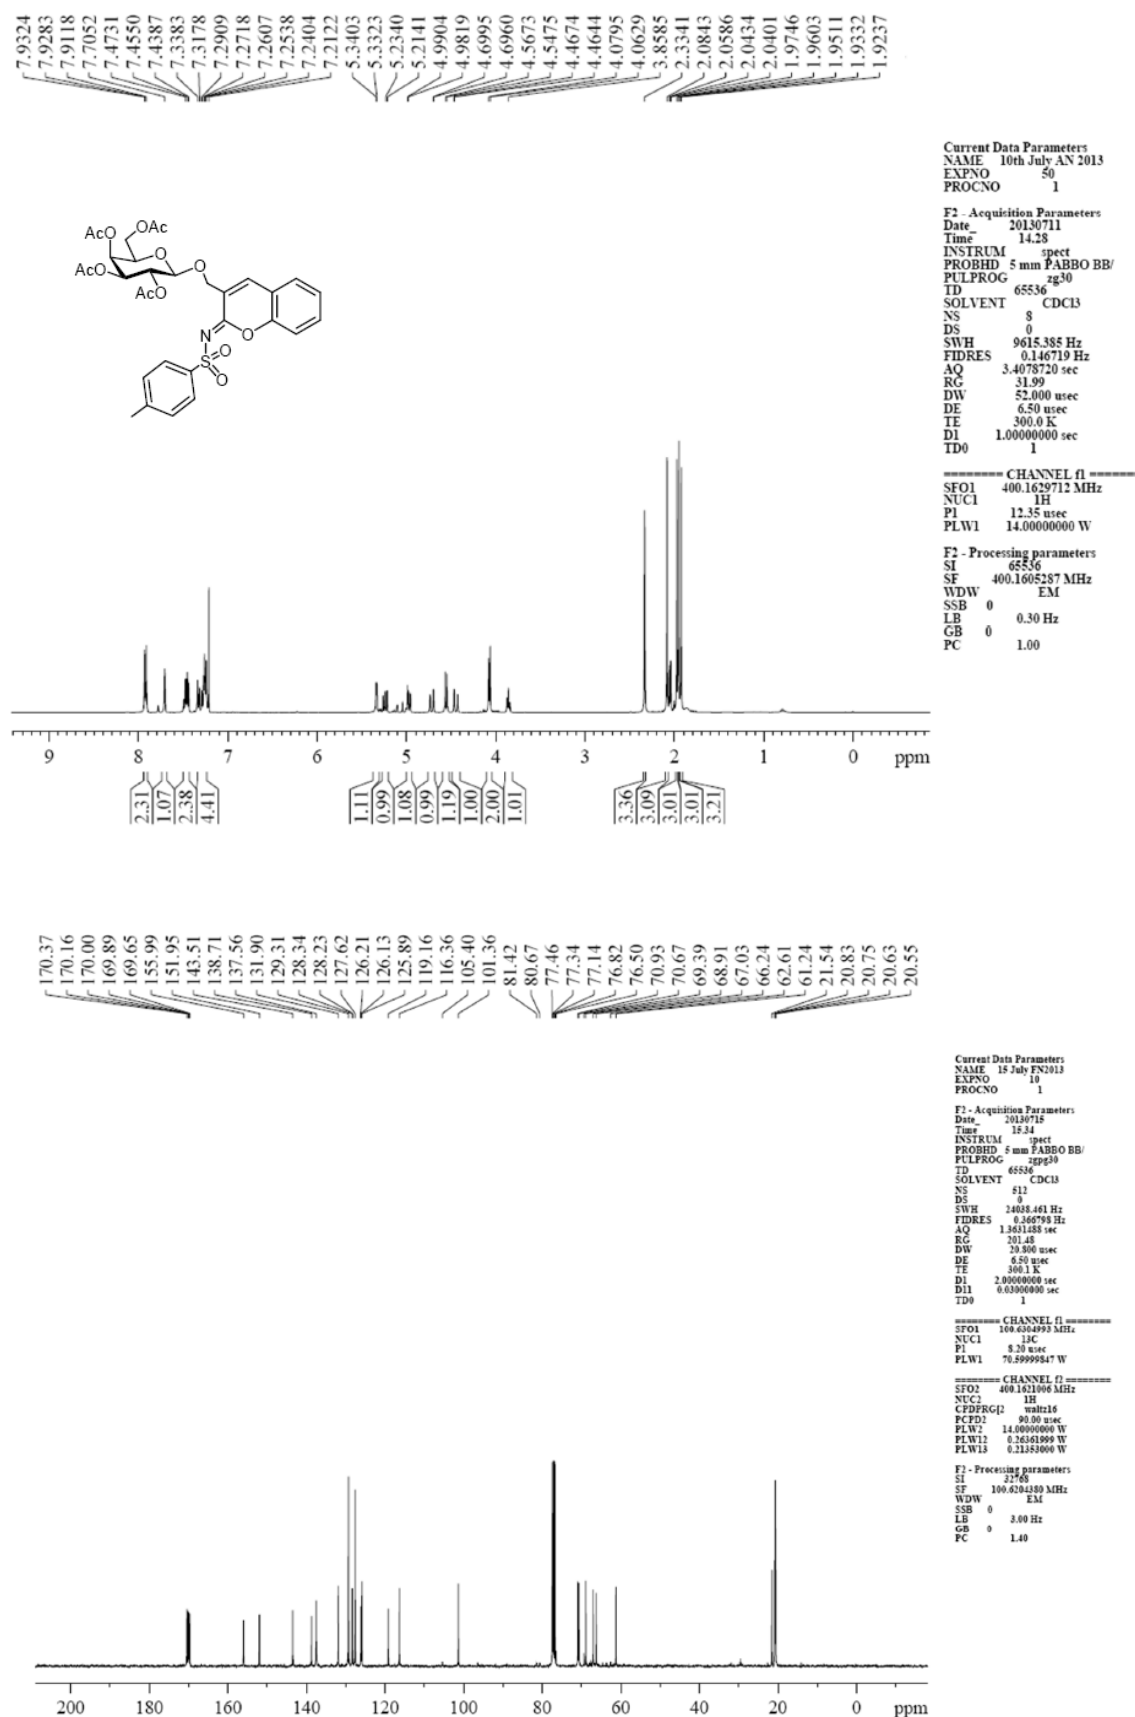

<sup>1</sup>H and <sup>13</sup>C NMR spectra of compound 5c

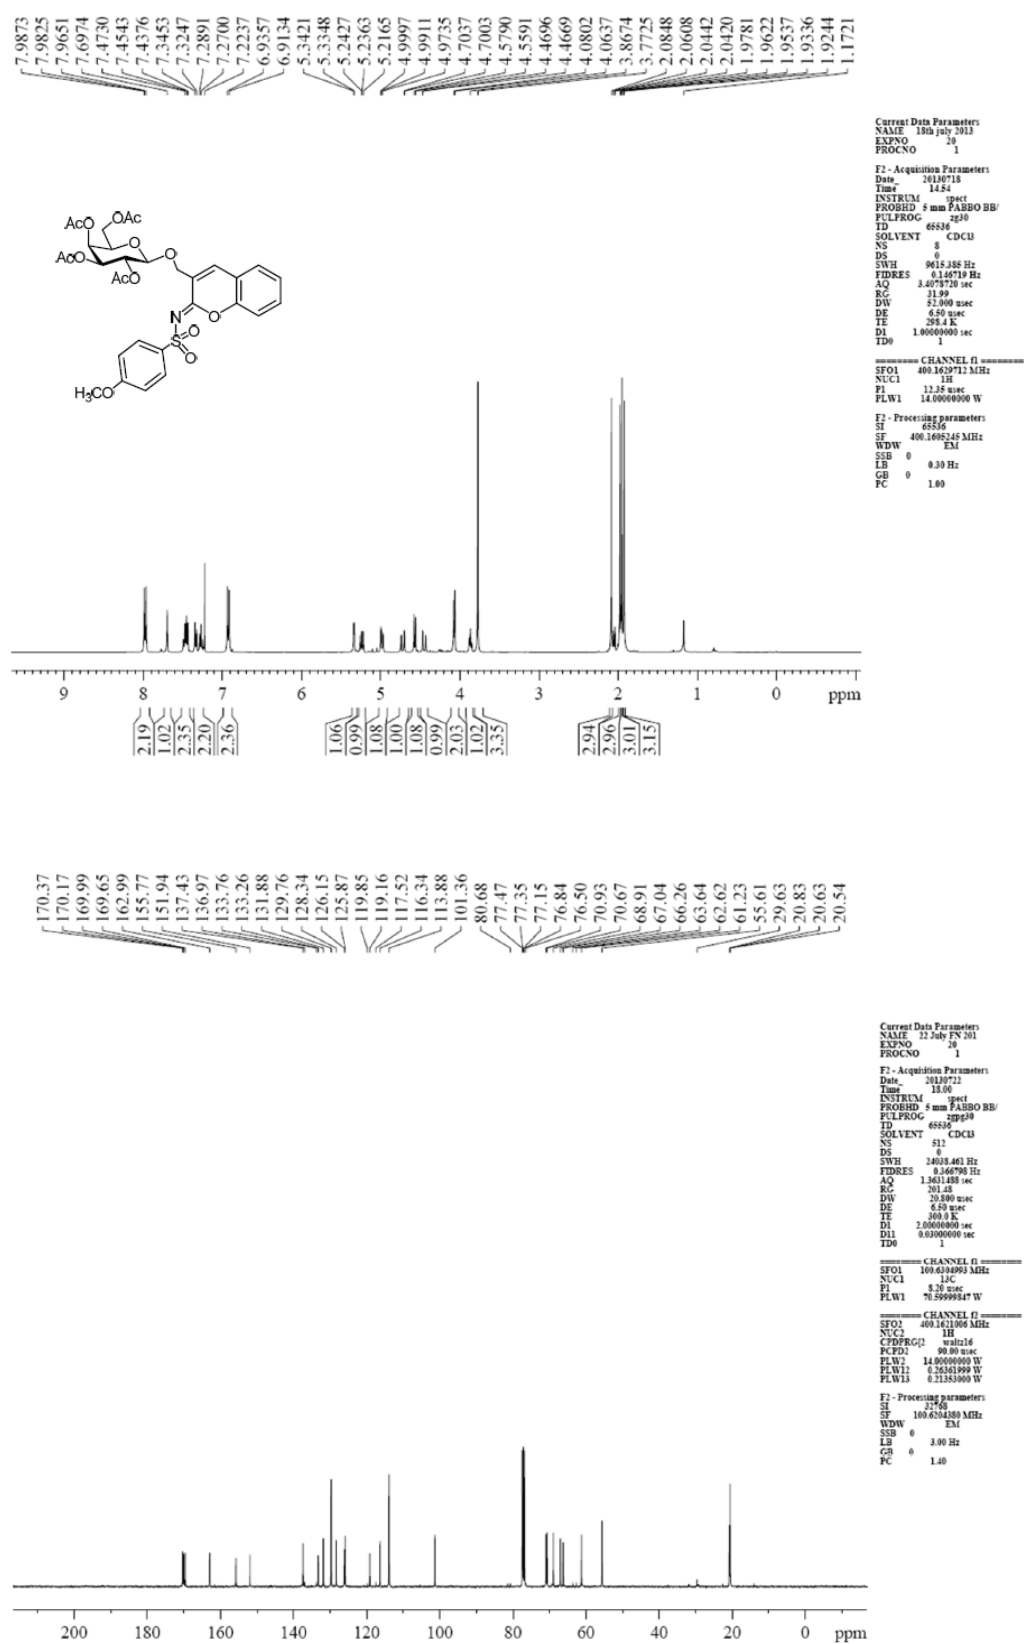

<sup>1</sup>H and <sup>13</sup>C NMR spectra of compound **5d**

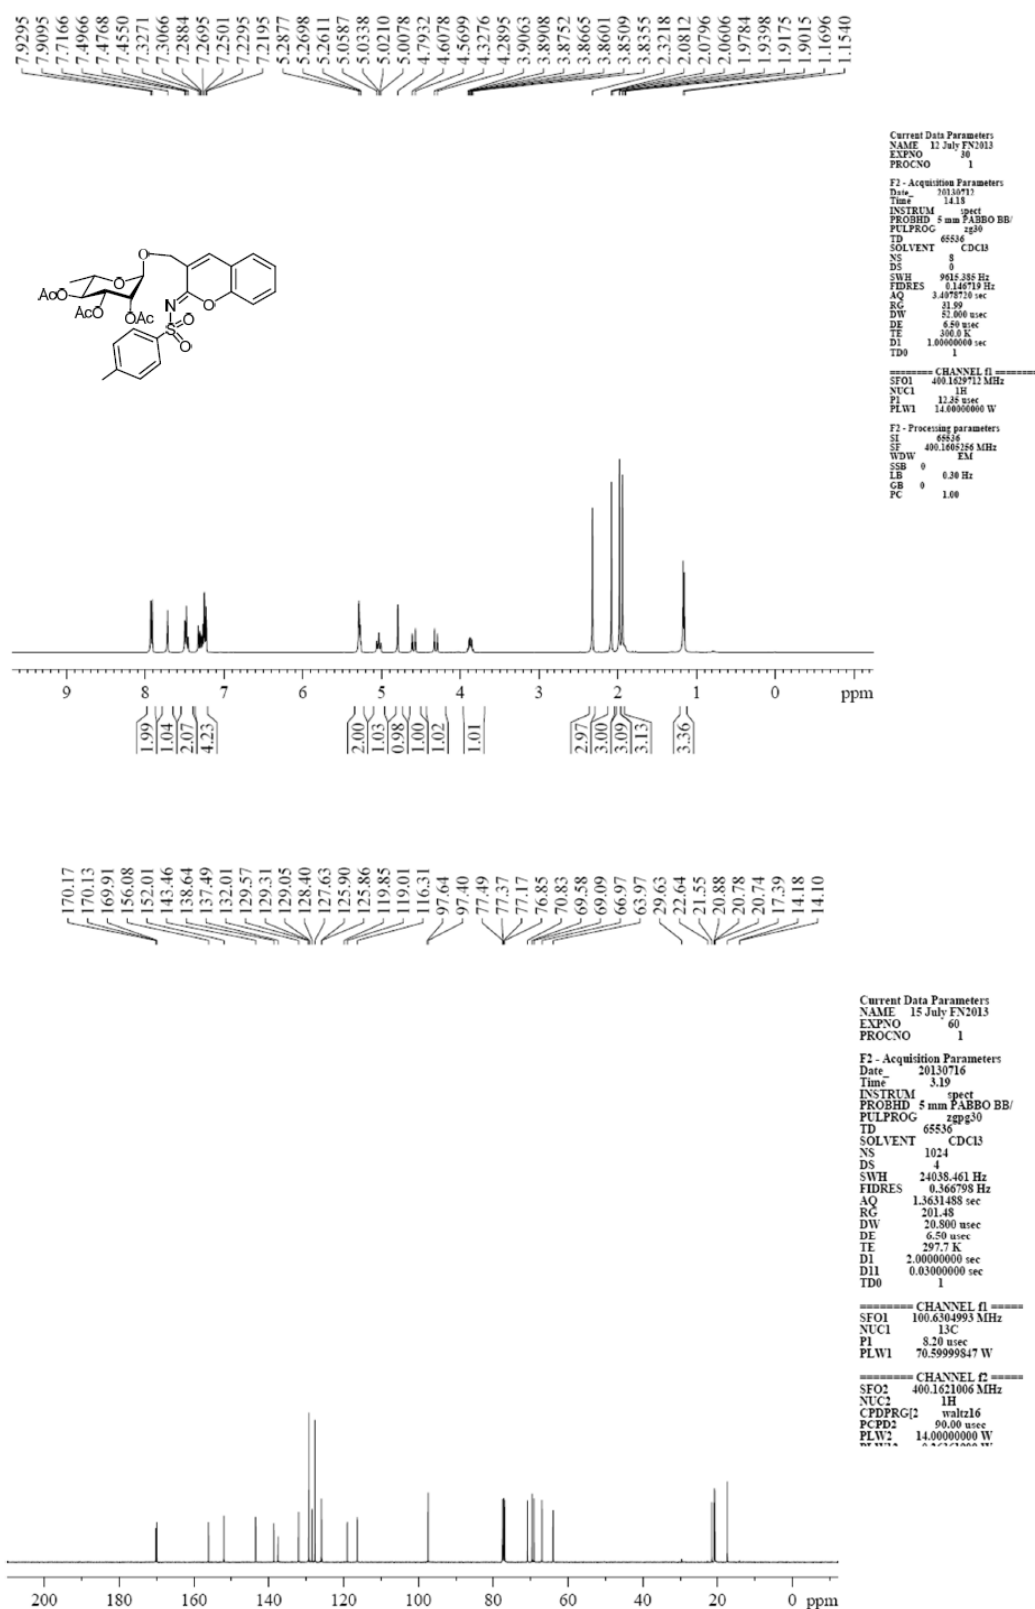

<sup>1</sup>H and <sup>13</sup>C NMR spectra of compound 5e

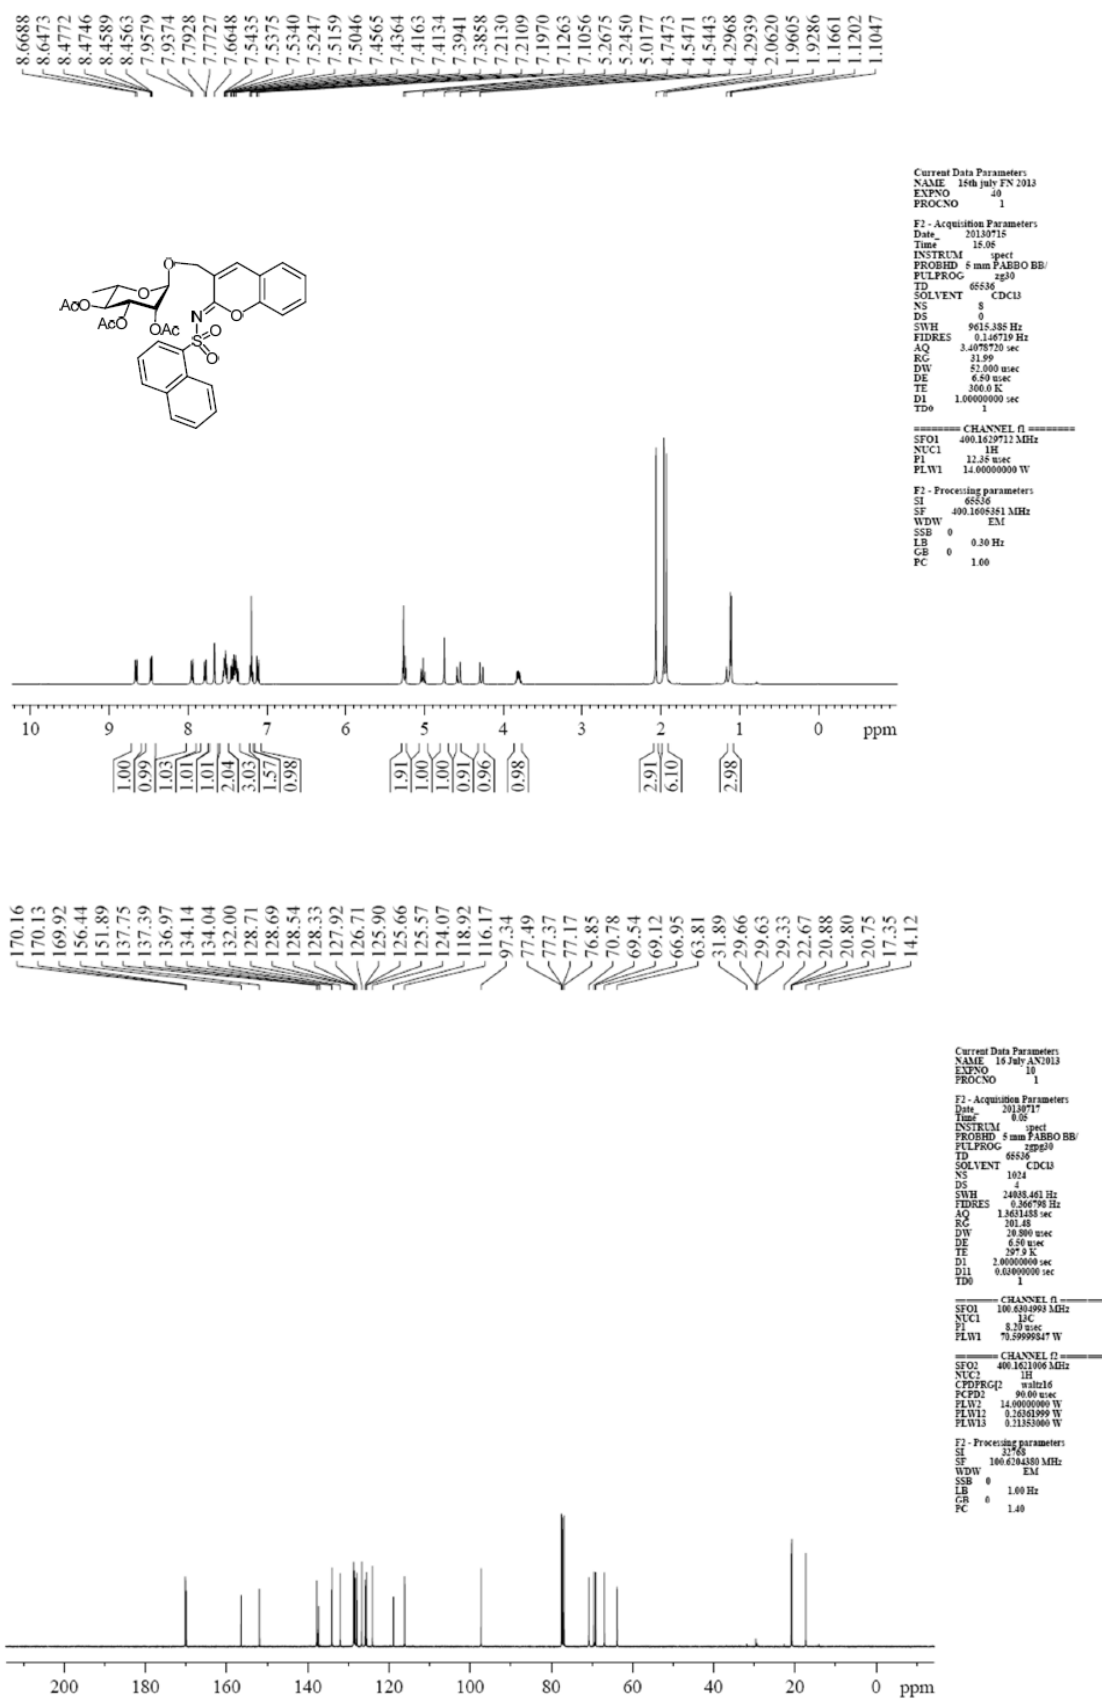

<sup>1</sup>H and <sup>13</sup>C NMR spectra of compound **5f**

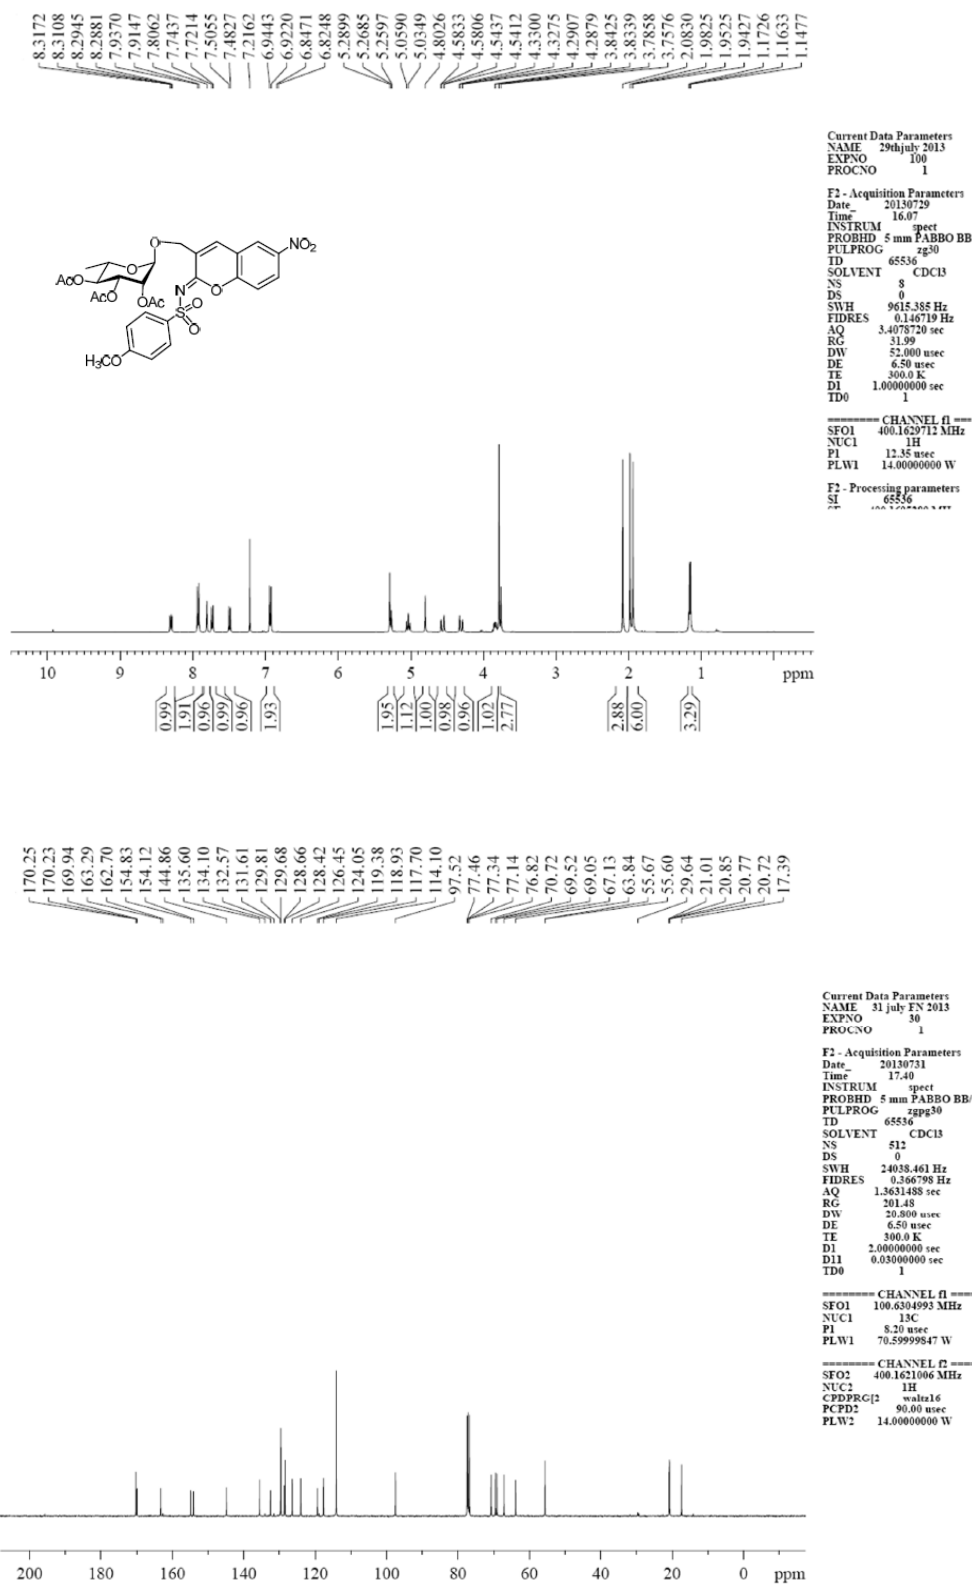

<sup>1</sup>H and <sup>13</sup>C NMR spectra of compound **5g**

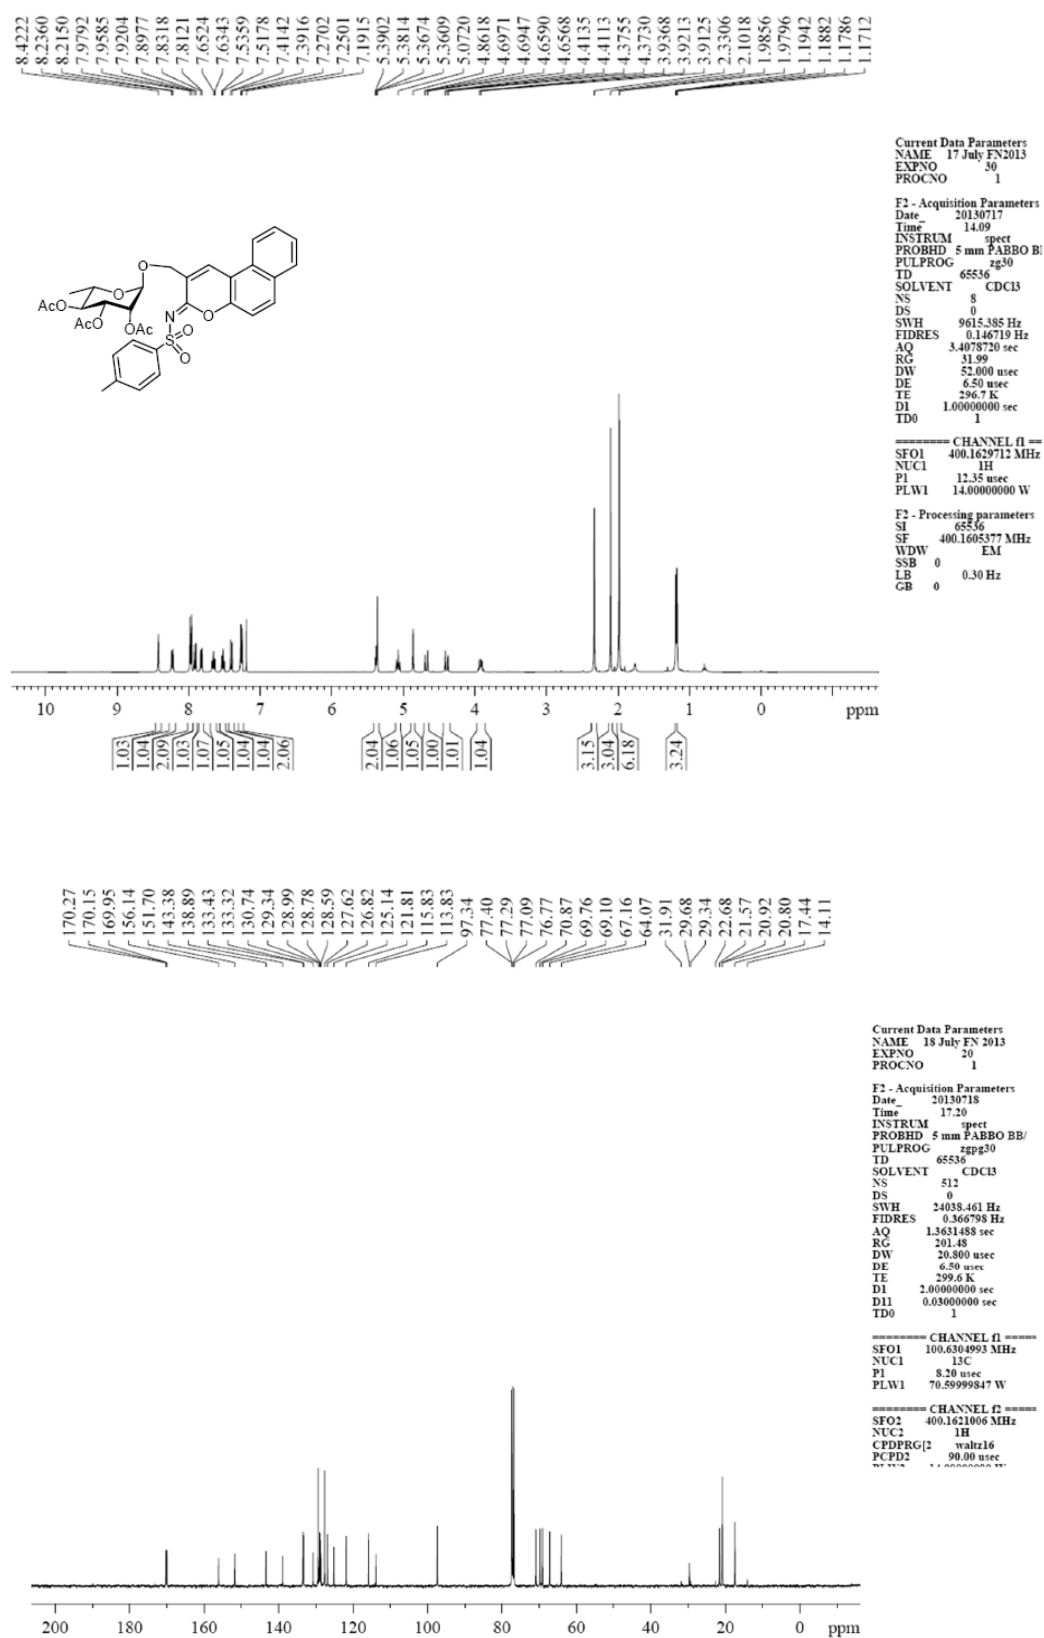

<sup>1</sup>H and <sup>13</sup>C NMR spectra of compound 5h

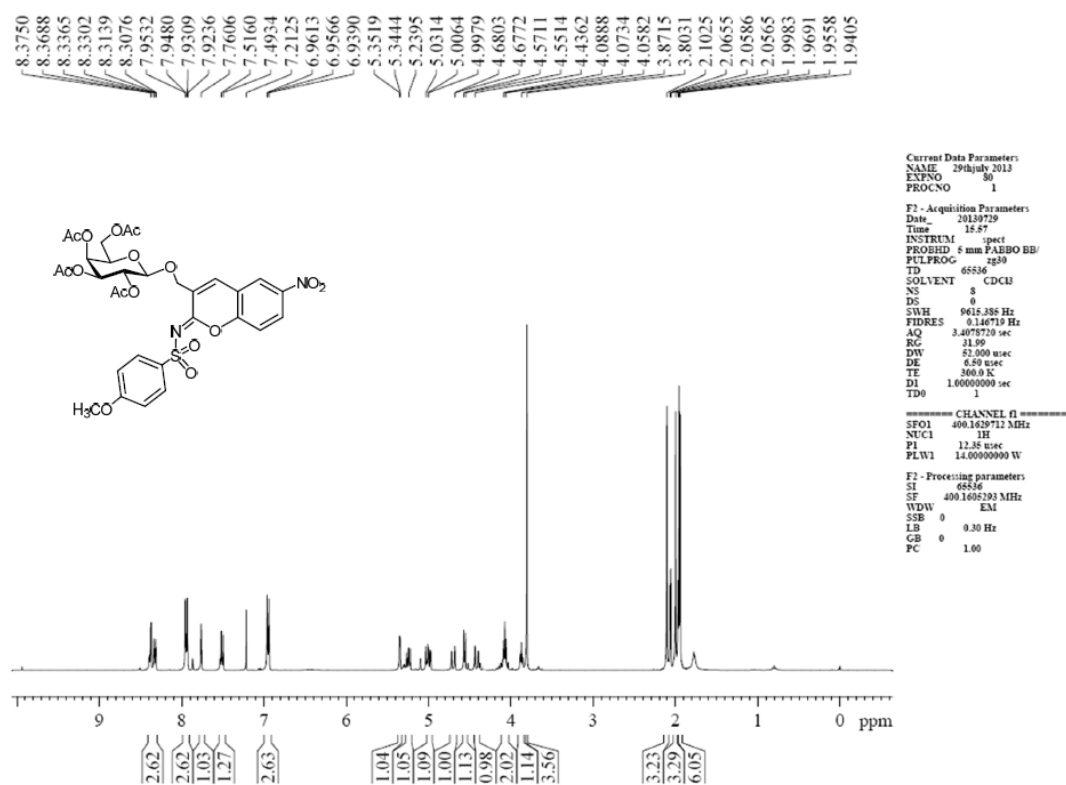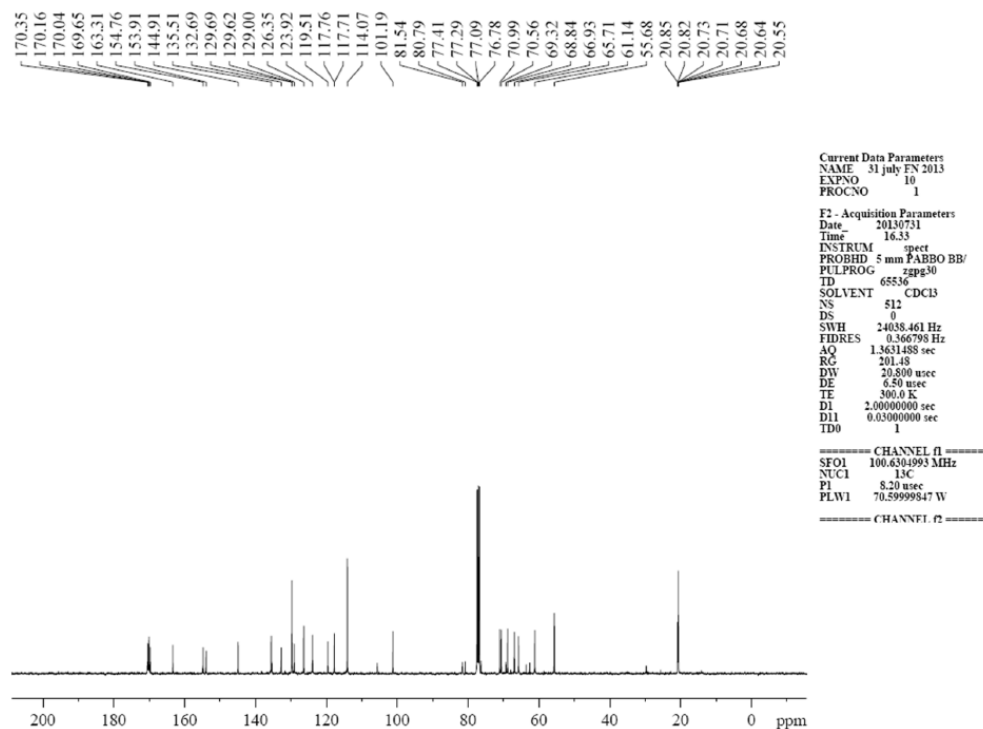

<sup>1</sup>H and <sup>13</sup>C NMR spectra of compound **5i**

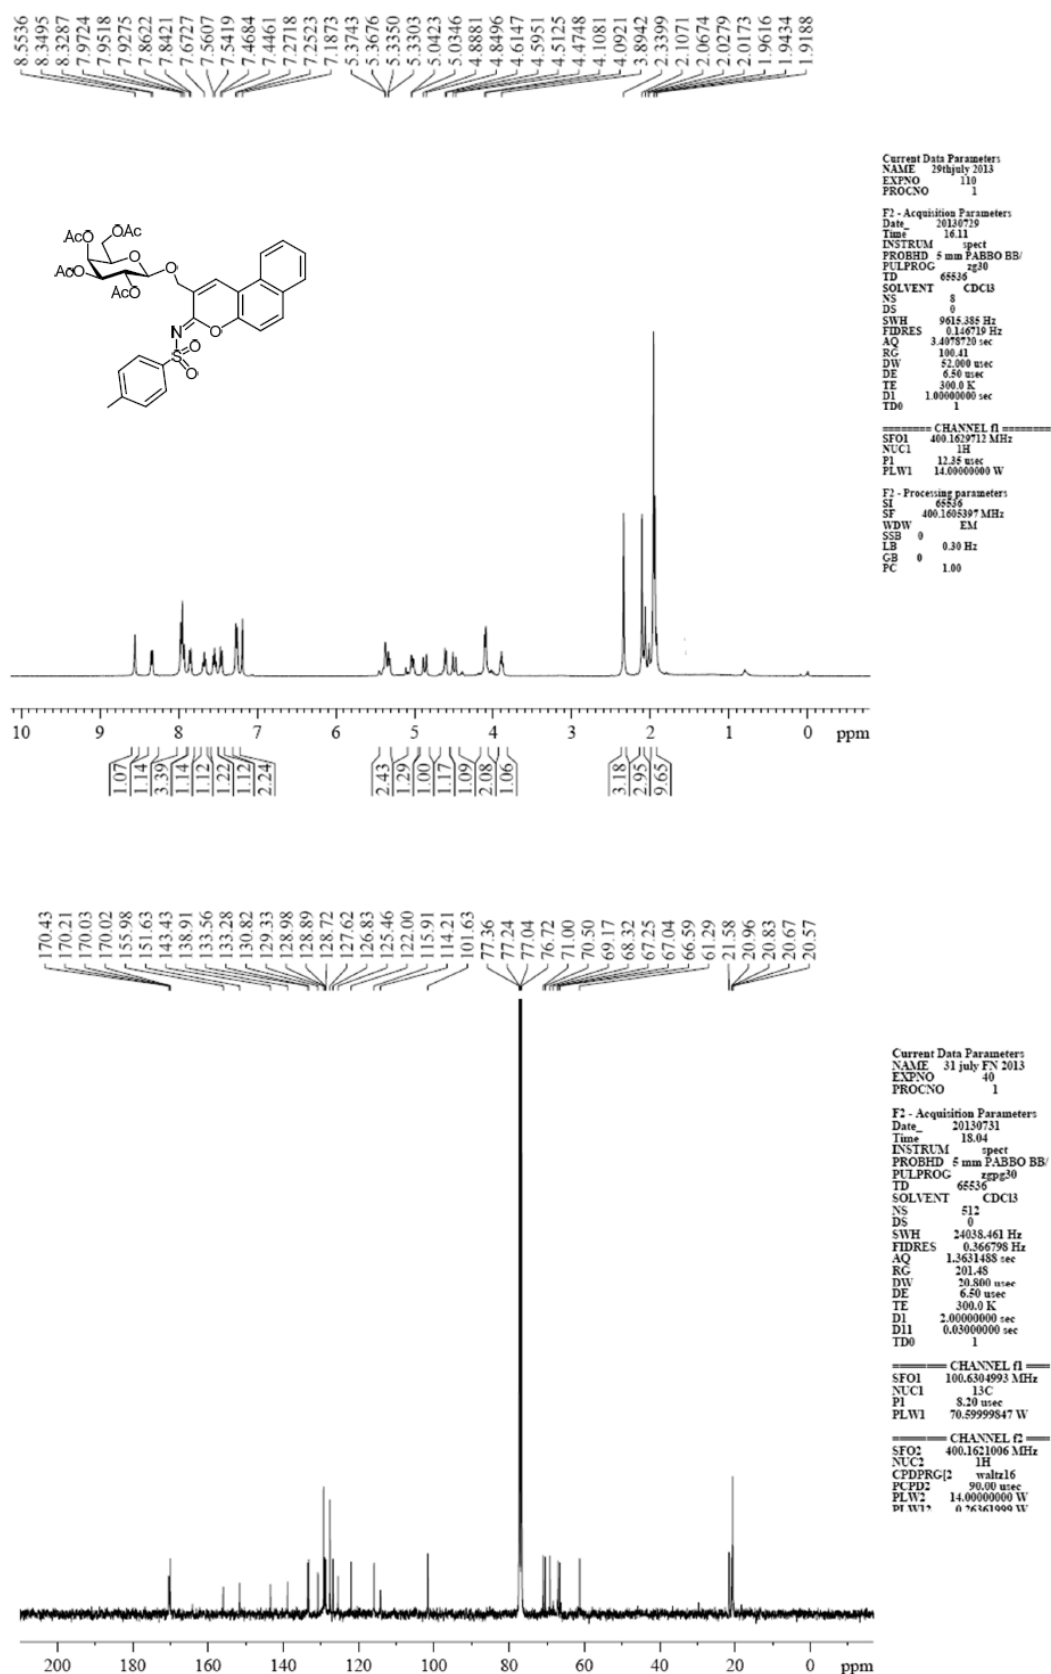<sup>1</sup>H and <sup>13</sup>C NMR spectra of compound **5j**



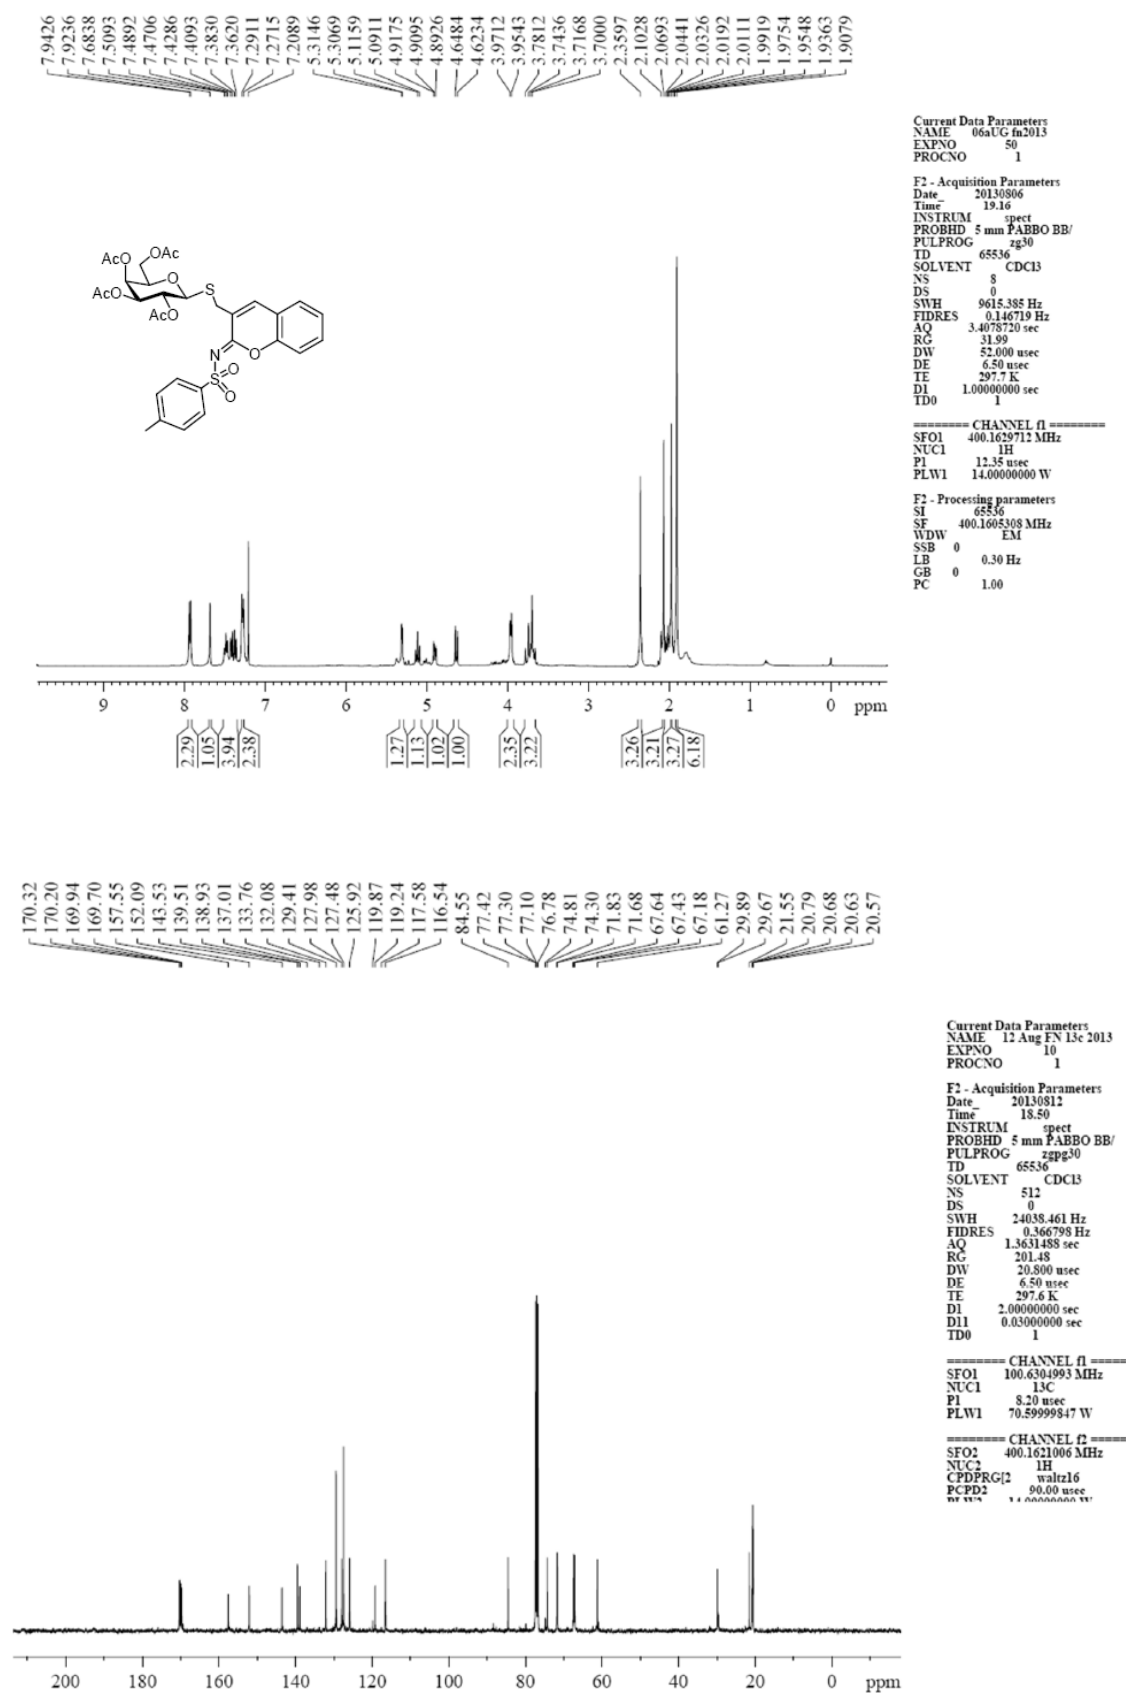

<sup>1</sup>H and <sup>13</sup>C NMR spectra of compound 5k

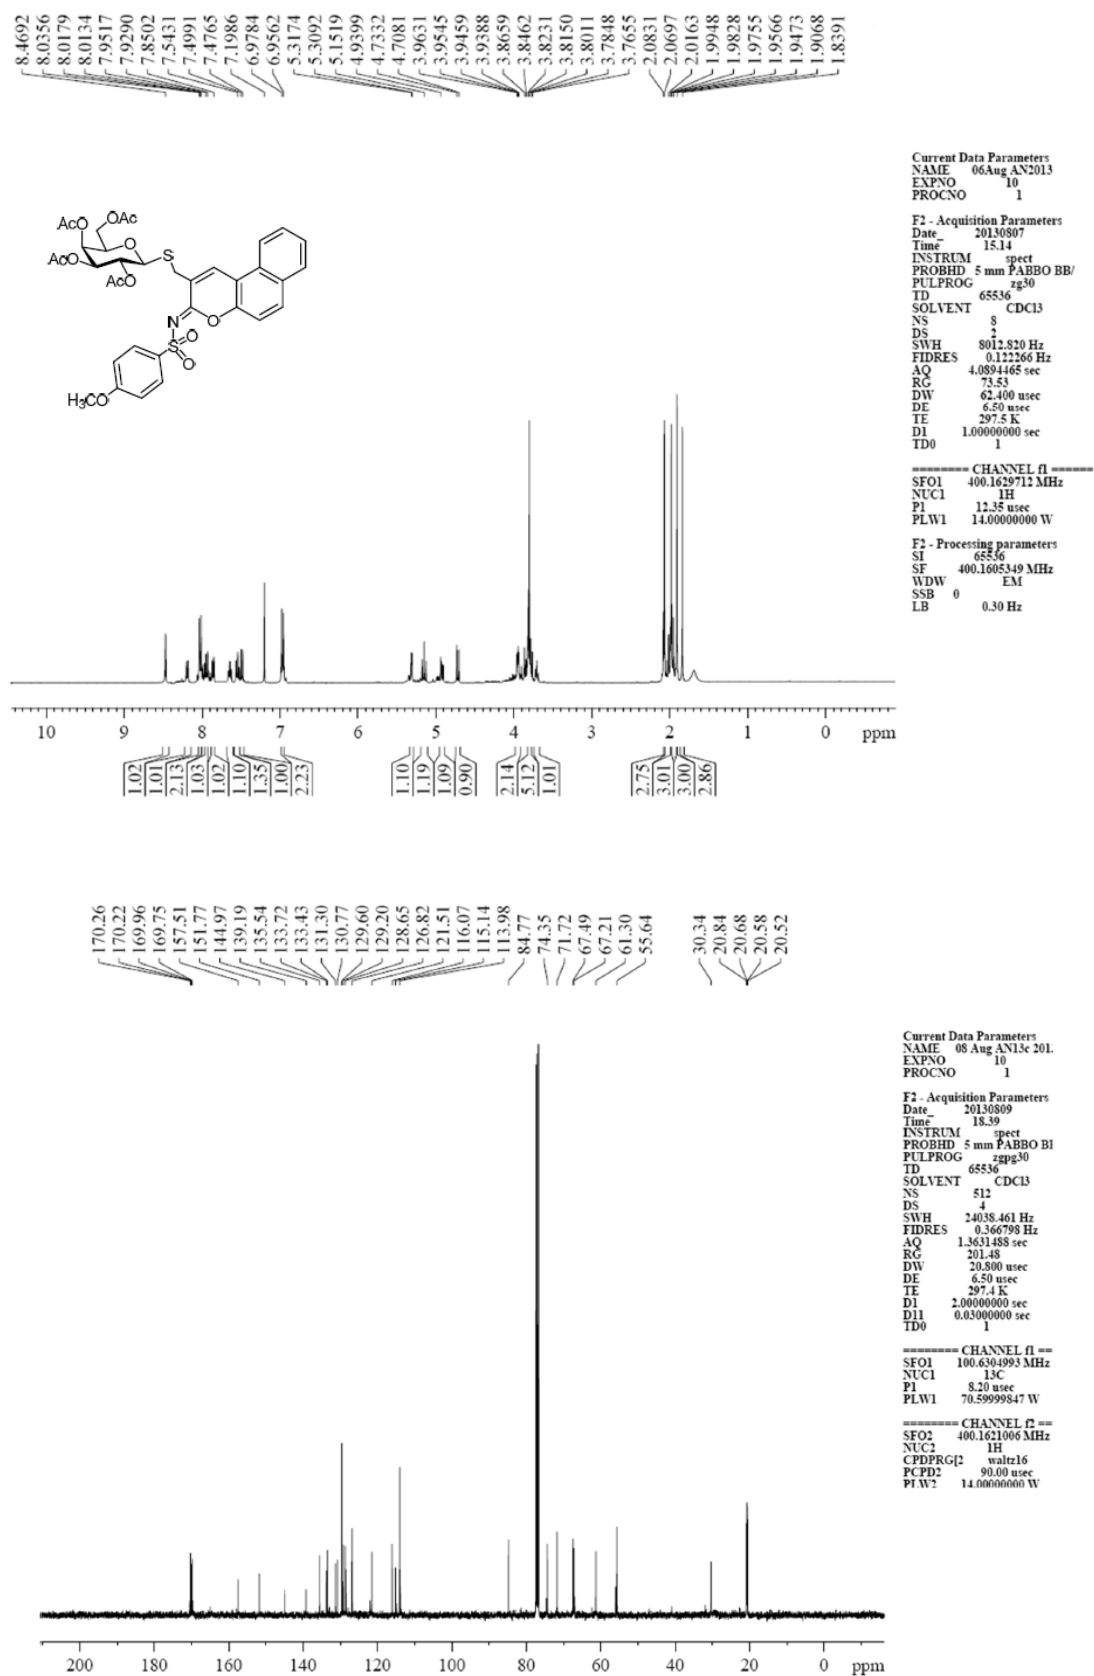

<sup>1</sup>H and <sup>13</sup>C NMR spectra of compound **51**

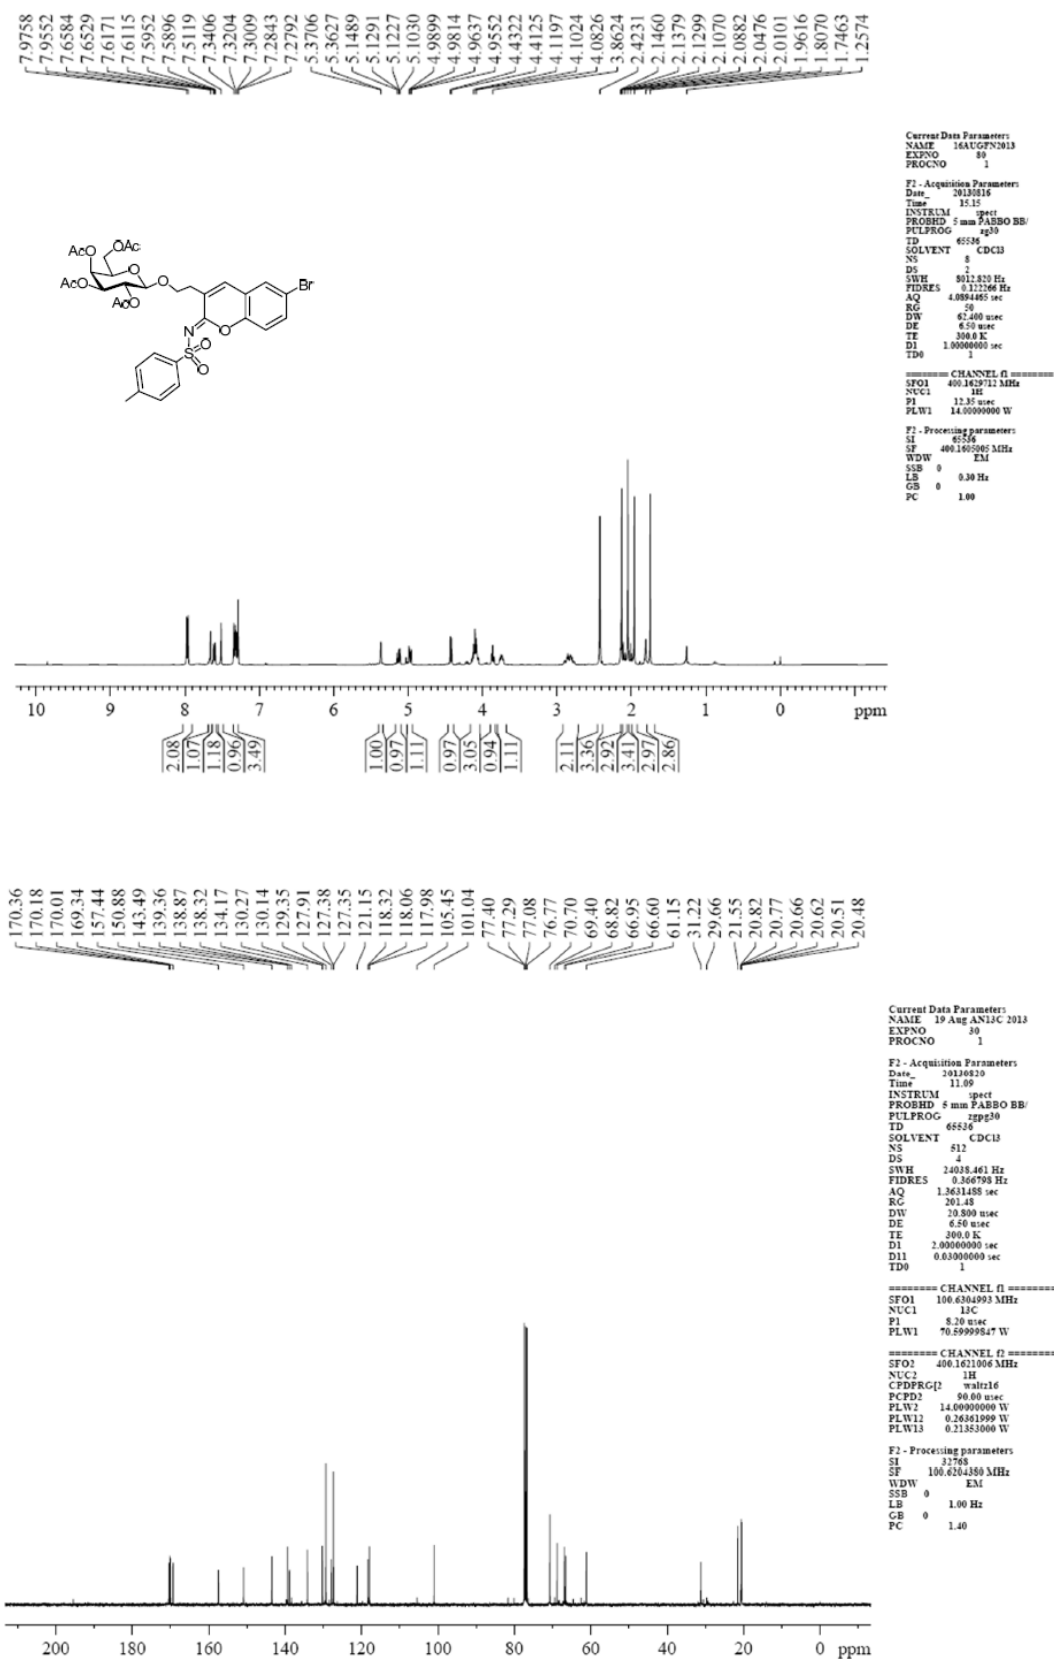

<sup>1</sup>H and <sup>13</sup>C NMR spectra of compound **5m**

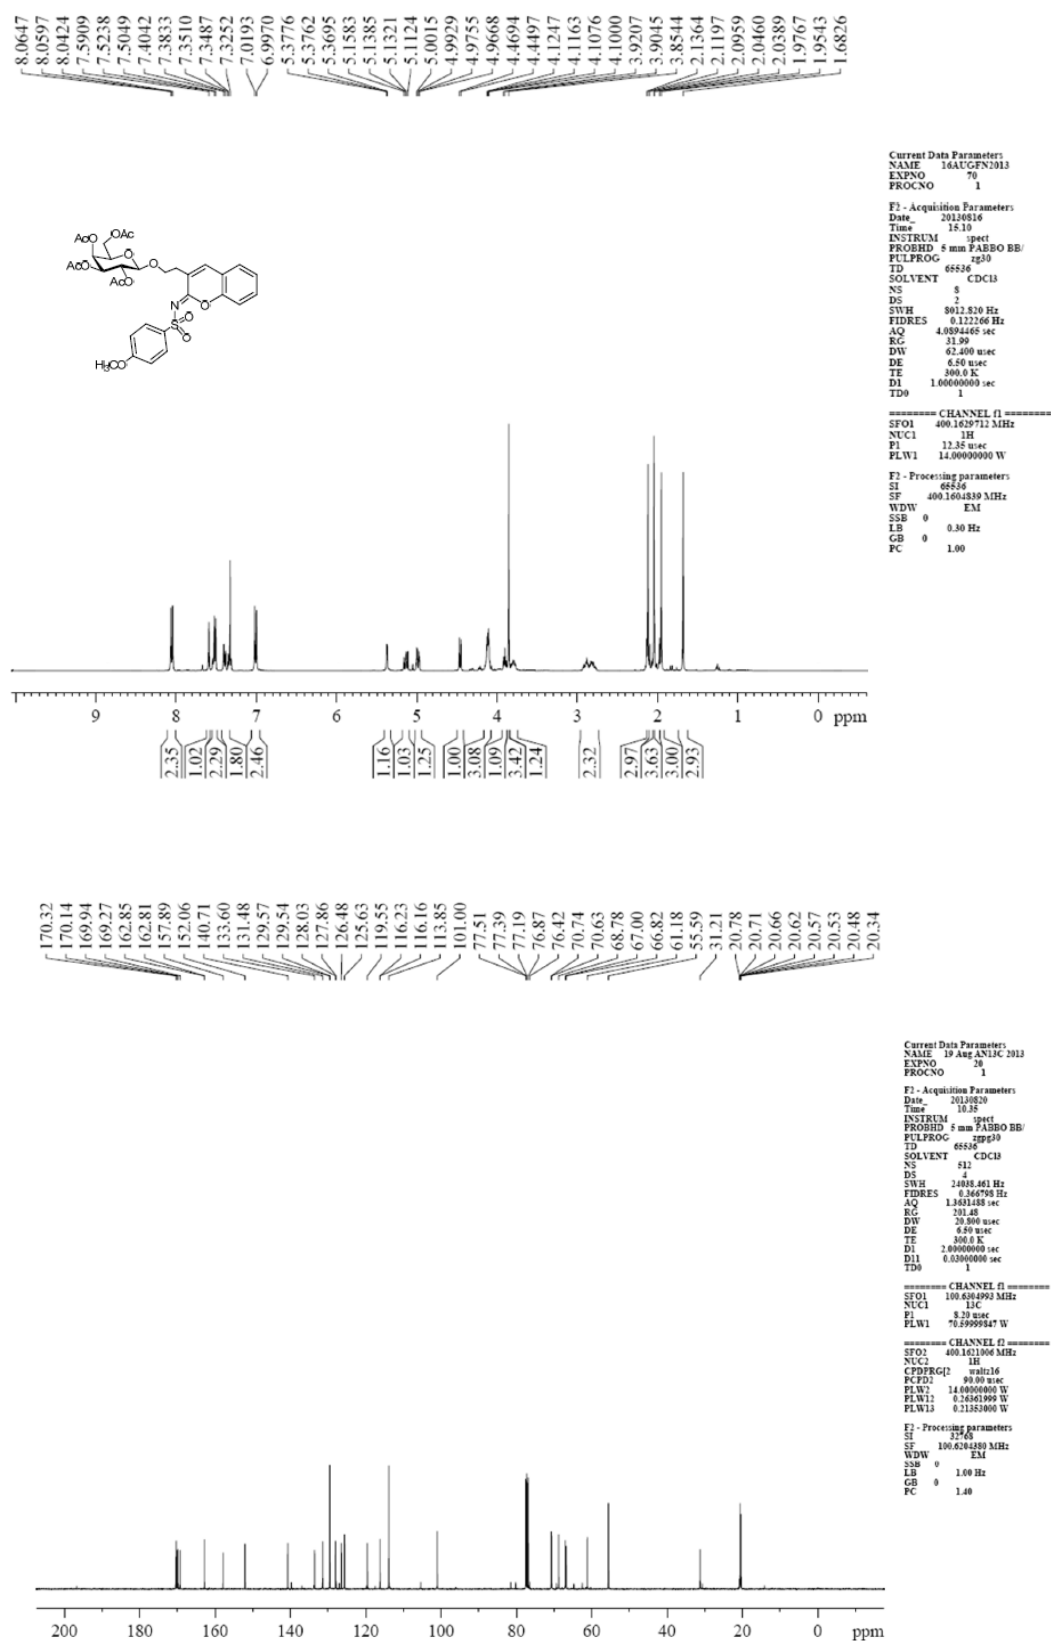

<sup>1</sup>H and <sup>13</sup>C NMR spectra of compound **5n**

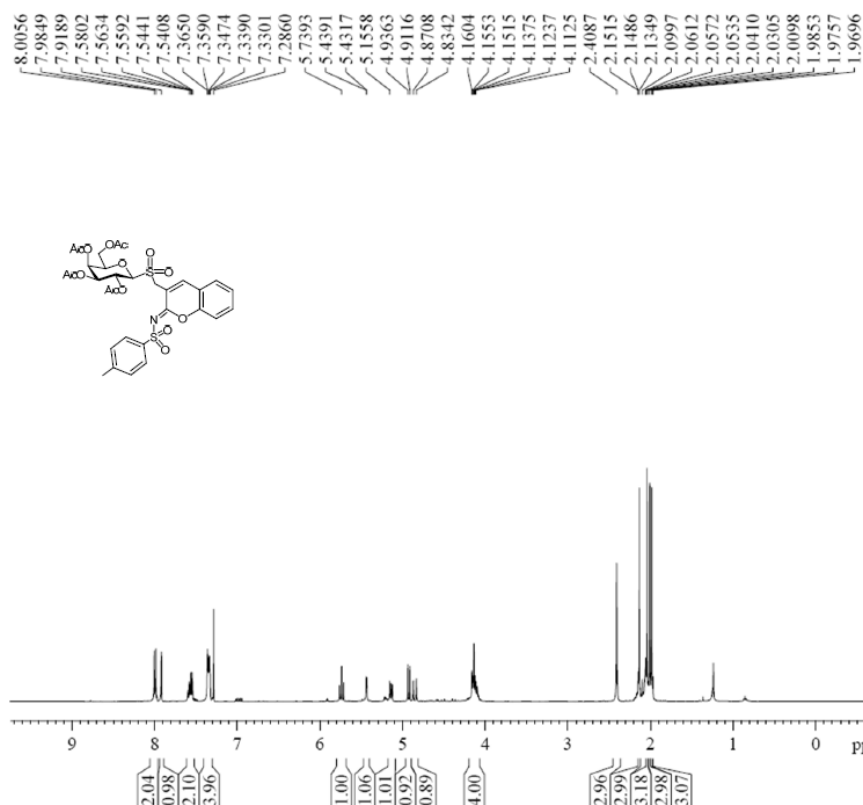

Current Data Parameters  
 NAME 29 Aug FN2013  
 EXPNO 110  
 PROCNO 1

F2 - Acquisition Parameters  
 Date\_ 20130819  
 Time 15.16  
 INSTRUM spect  
 PROBHD 5 mm FABBO BB/  
 PULPROG zg30  
 TD 65536  
 SOLVENT CDCl3  
 NS 8  
 DS 0  
 SWH 9615.385 Hz  
 FIDRES 0.146719 Hz  
 AQ 3.4075720 sec  
 RG 31.99  
 DW 62.000 usec  
 DE 6.50 usec  
 TE 297.2 K  
 D1 1.00000000 sec  
 TD0 1

===== CHANNEL f1 =====  
 SFO1 400.1619712 MHz  
 NUC1 1H  
 P1 12.35 usec  
 PLW1 14.00000000 W

F2 - Processing parameters  
 SI 65536  
 SF 400.16195900 MHz  
 WDW EM  
 SSB 0  
 LB 0.30 Hz  
 GB 0  
 PC 1.00

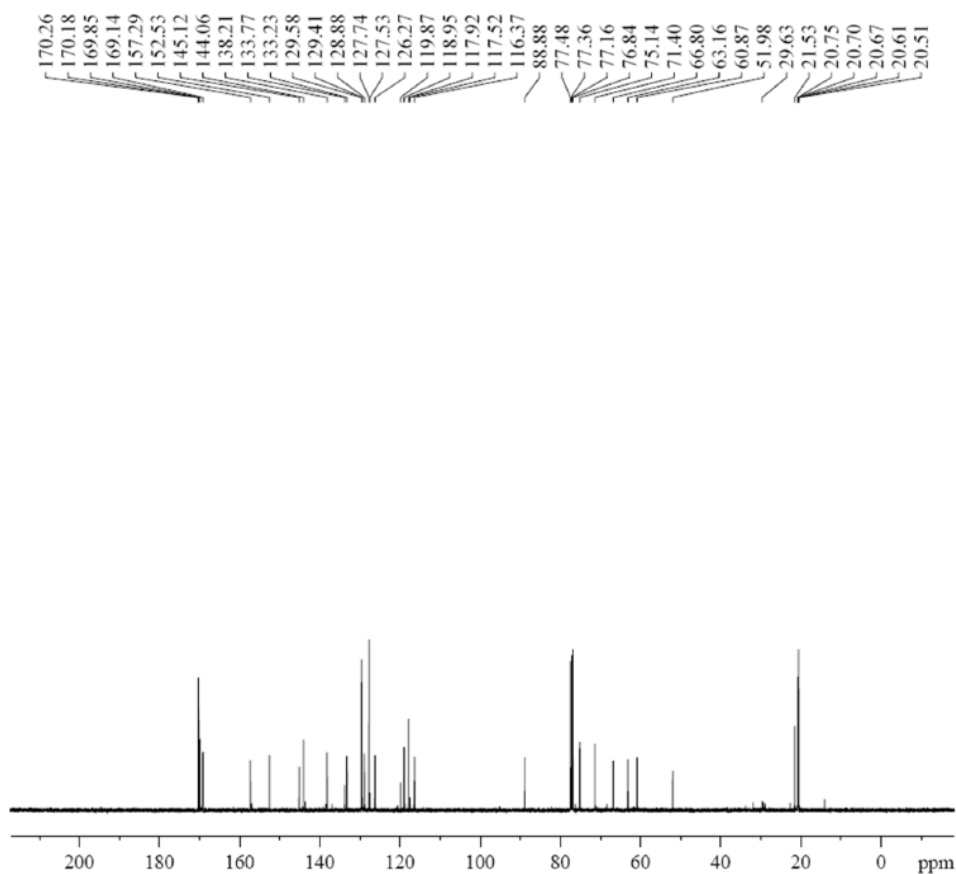

Current Data Parameters  
 NAME 30 Aug AN2013  
 EXPNO 10  
 PROCNO 1

F2 - Acquisition Parameters  
 Date\_ 20130831  
 Time 11.21  
 INSTRUM spect  
 PROBHD 5 mm FABBO BB/  
 PULPROG zgpg30  
 TD 65536  
 SOLVENT CDCl3  
 NS 512  
 DS 4  
 SWH 24038.461 Hz  
 FIDRES 0.366739 Hz  
 AQ 1.3631488 sec  
 RG 201.48  
 DW 20.500 usec  
 DE 6.50 usec  
 TE 300.0 K  
 D1 2.00000000 sec  
 D11 0.03000000 sec  
 TD0 1

===== CHANNEL f1 =====  
 SFO1 100.6304993 MHz  
 NUC1 13C  
 P1 8.20 usec  
 PLW1 70.59999947 W

===== CHANNEL f2 =====  
 SFO2 400.1621006 MHz  
 NUC2 1H  
 PC 1.00

<sup>1</sup>H and <sup>13</sup>C NMR spectra of compound **5o**

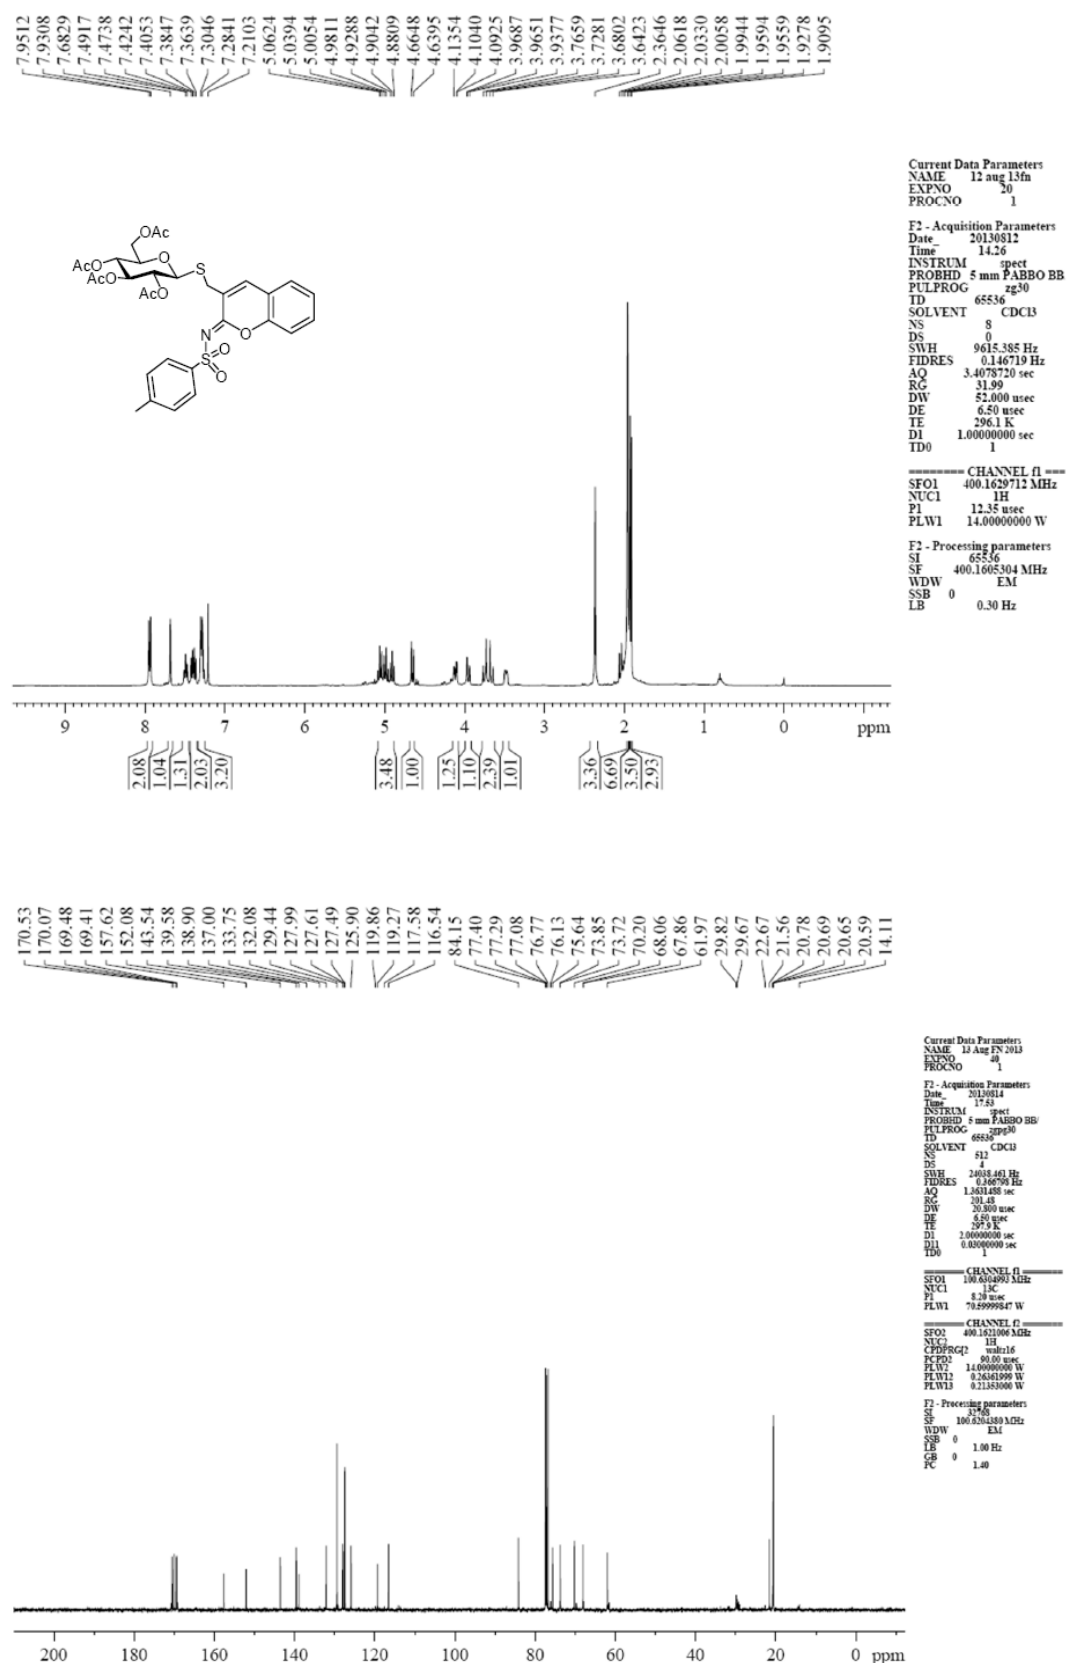

<sup>1</sup>H and <sup>13</sup>C NMR spectra of compound 5p

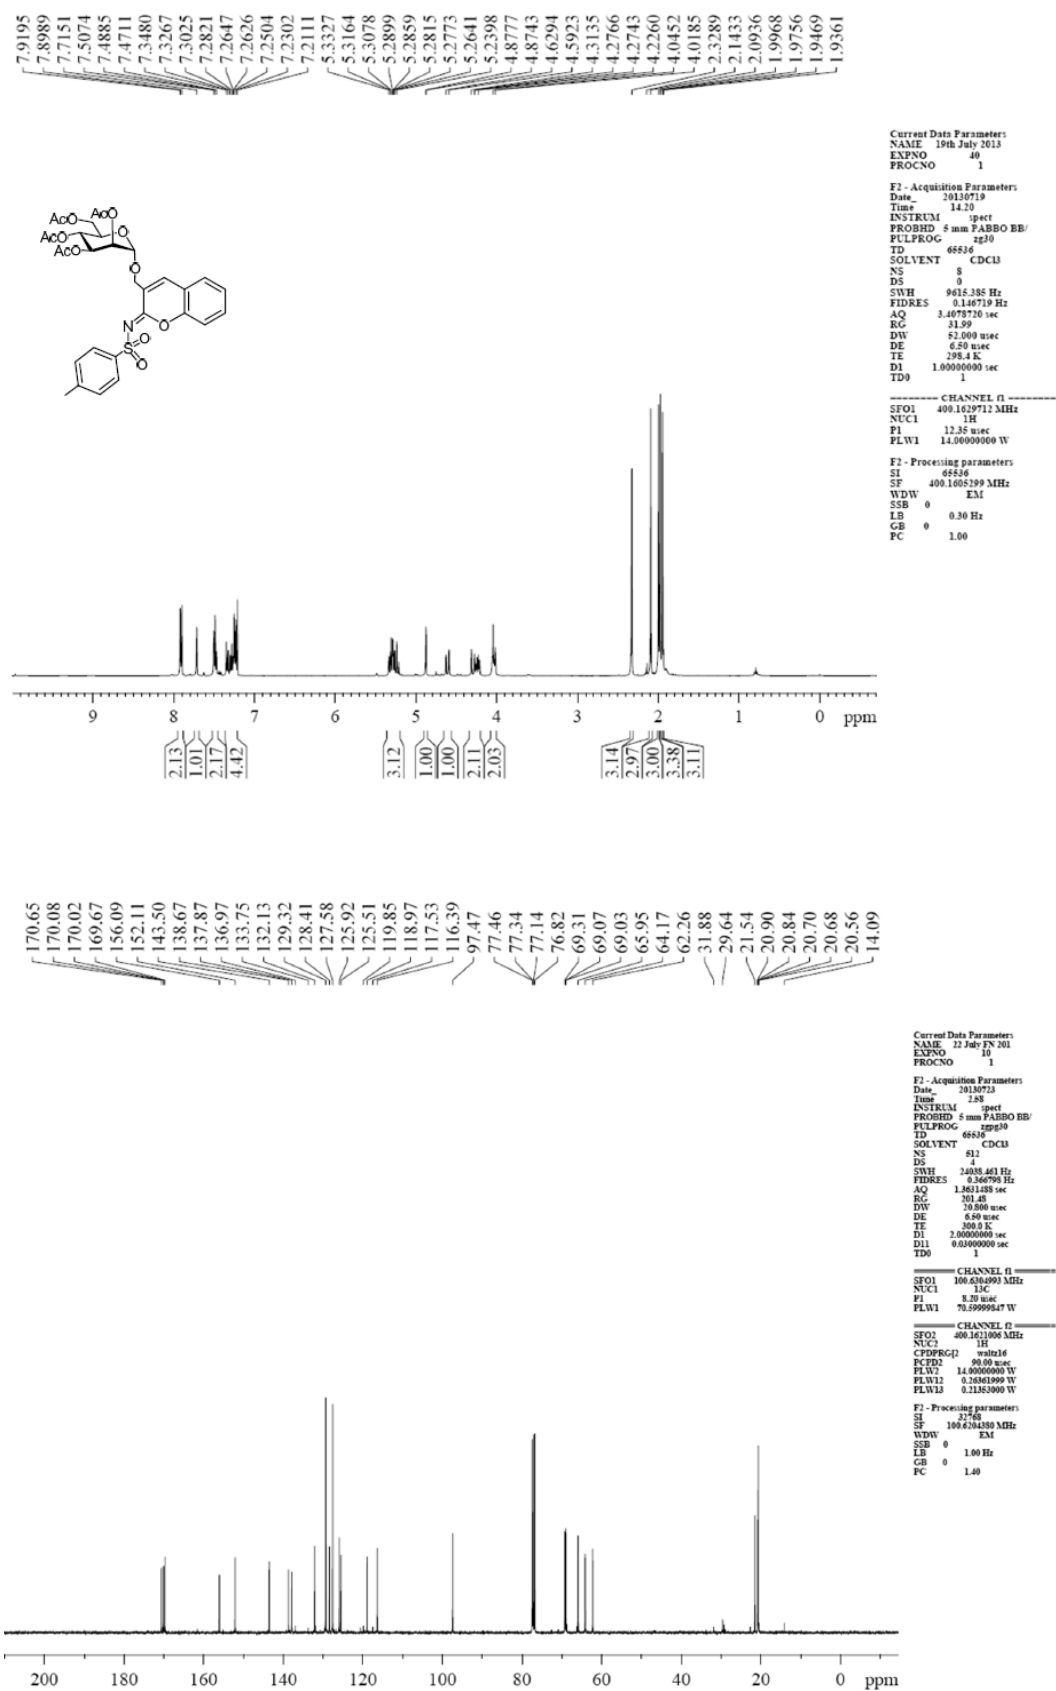

<sup>1</sup>H and <sup>13</sup>C NMR spectra of compound **5q**

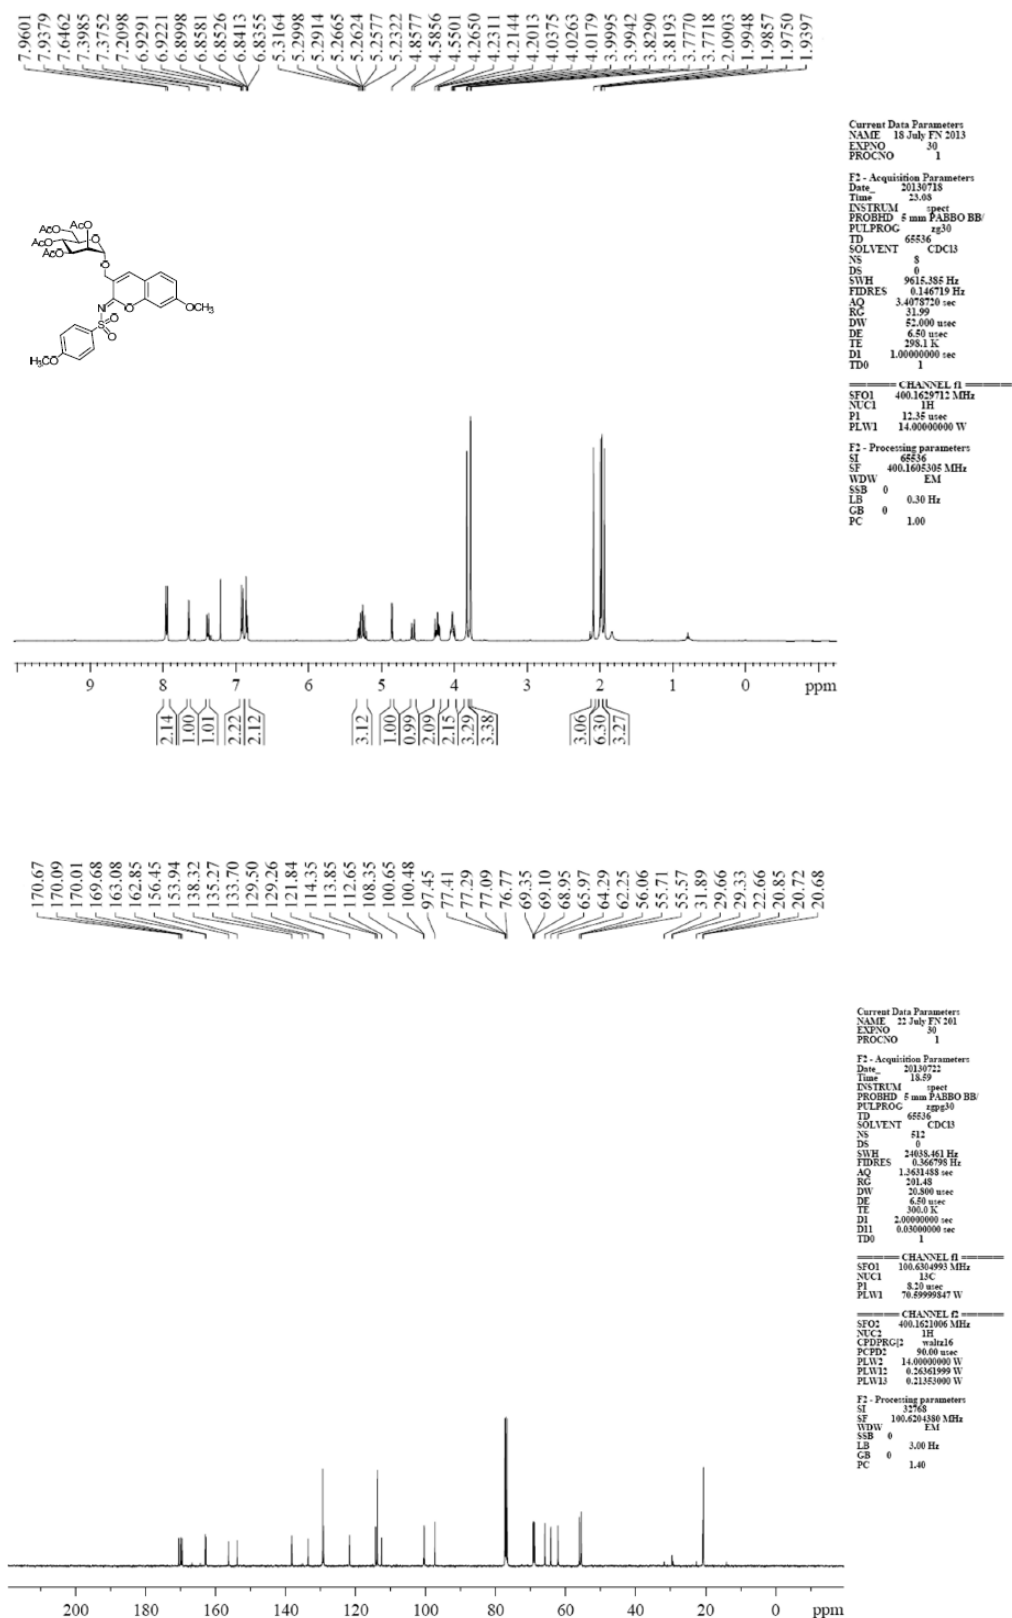

<sup>1</sup>H and <sup>13</sup>C NMR spectra of compound **5r**



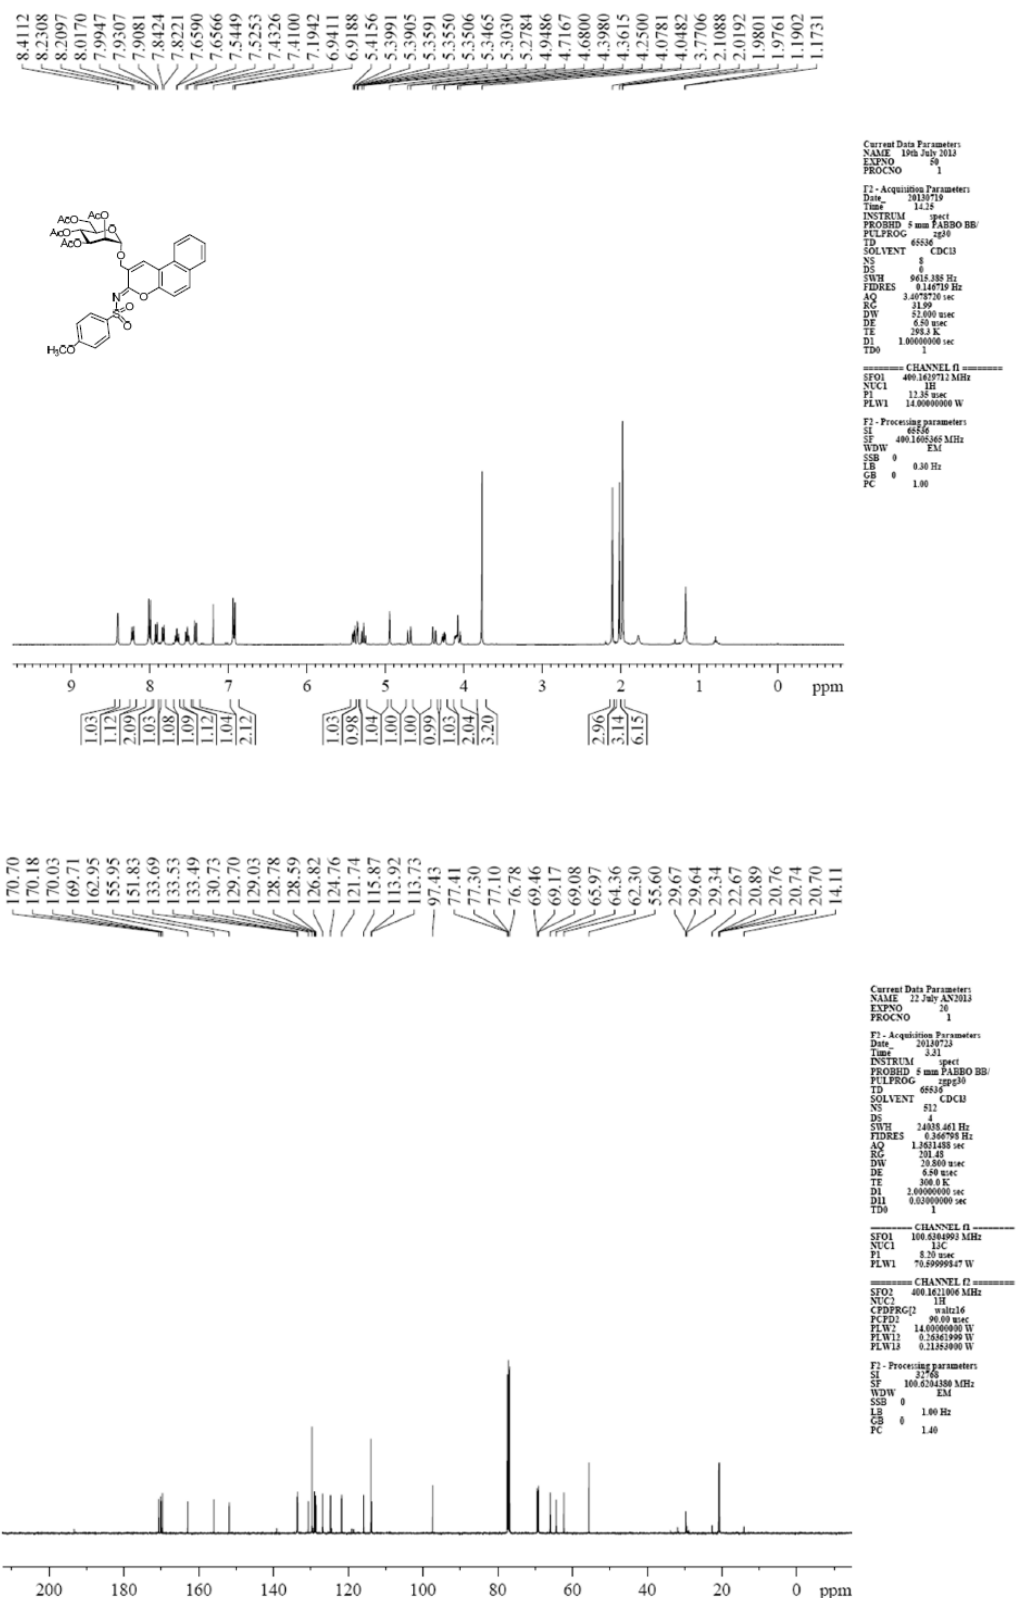

<sup>1</sup>H and <sup>13</sup>C NMR spectra of compound **5s**

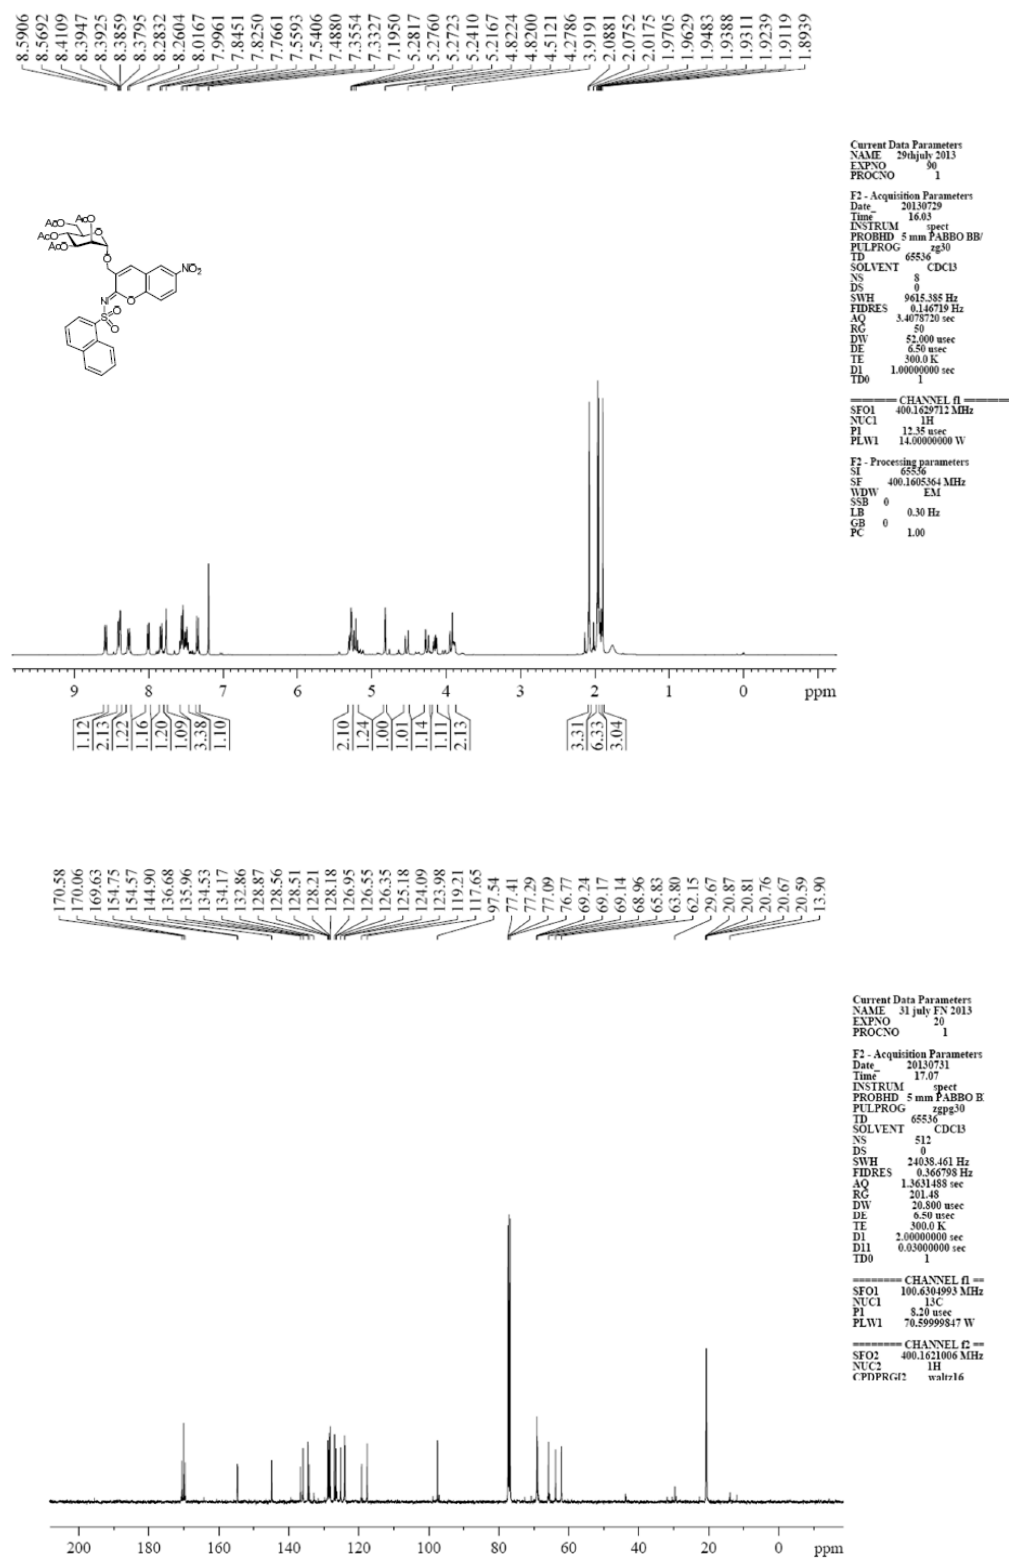

<sup>1</sup>H and <sup>13</sup>C NMR spectra of compound **5t**

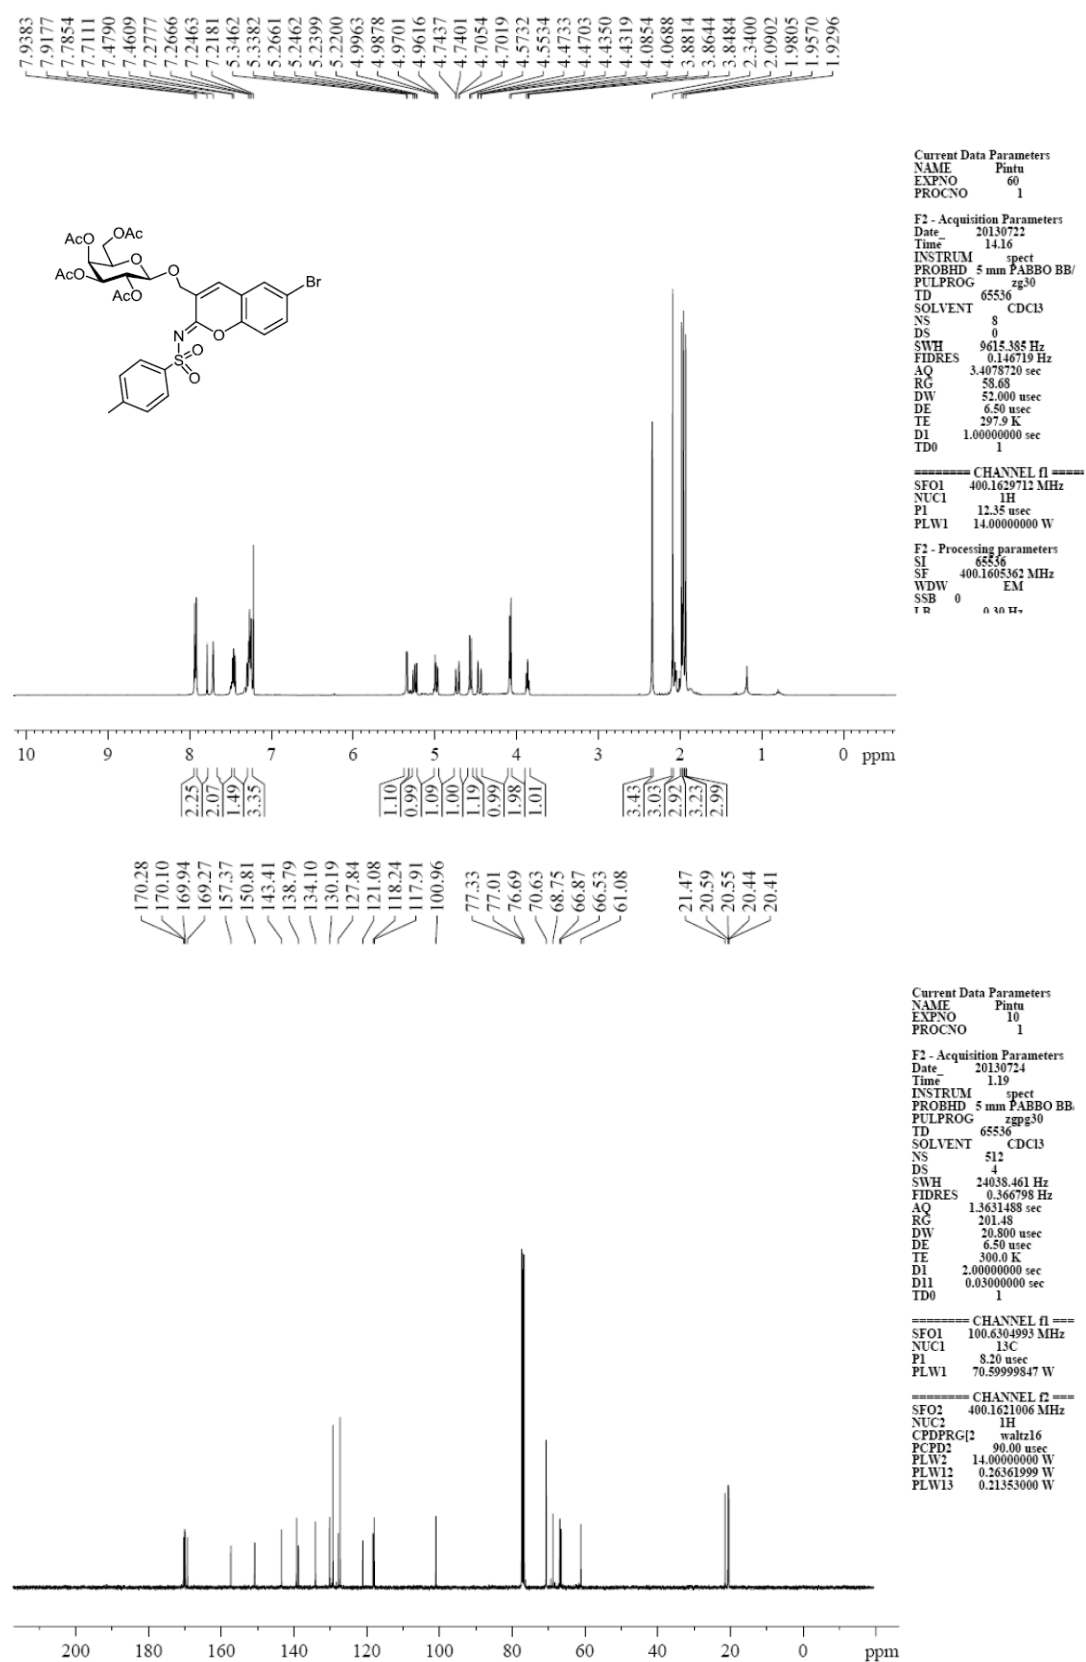

<sup>1</sup>H and <sup>13</sup>C NMR spectra of compound **5u**



```

Current Data Parameters
NAME      01 Aug. FN 2013
EXPNO     20
PROCNO    1

F2 - Acquisition Parameters
Date_      20130801
Time       14.18
INSTRUM    spect
PROBHD     5 mm PABBO/BP
PULPROG    zg30
TD          65536
SOLVENT    CDCl3
NS          8
DS          0
SWH         9615.385 Hz
FIDRES      0.166710 Hz
AQ          3.4077520 sec
RG          58.68
WDW          52.000 sec
DE          6.50 usec
TE          300.2 K
D1          1.0000000 sec
TD0         1

                                CHANNEL f1
SF01       400.1629711 MHz
NUC1        1H
P1          12.35 usec
PL1         0.00000000 W

F2 - Processing parameters
SI          65536
SF          400.1605331 MHz
WDW         EM
SSB         0
LB          0.30 Hz
GB          0
PC          1.00

```

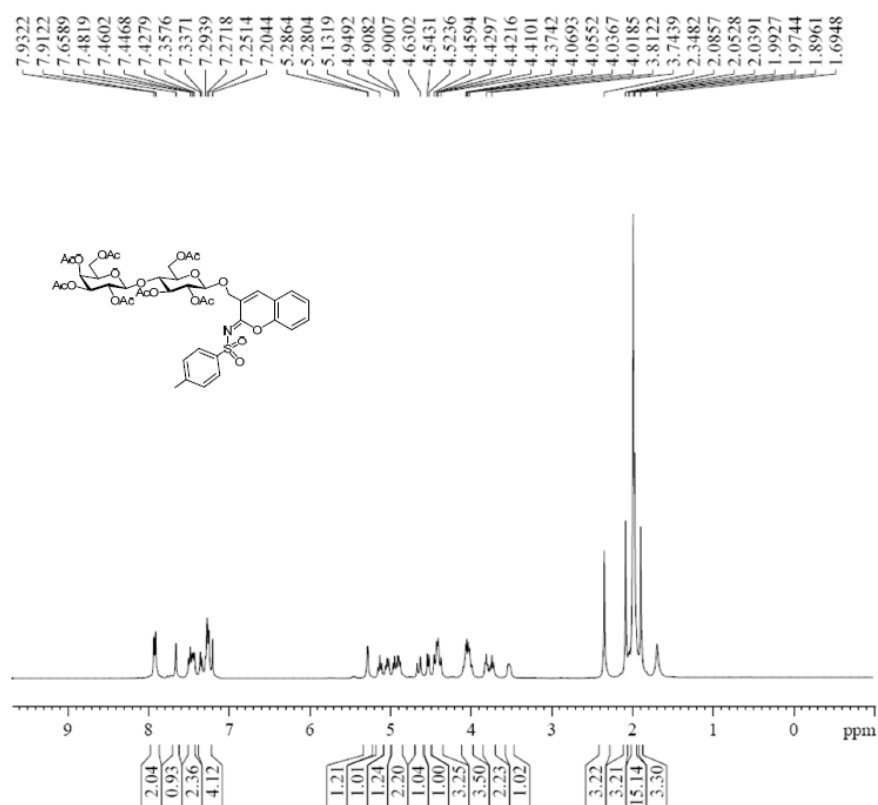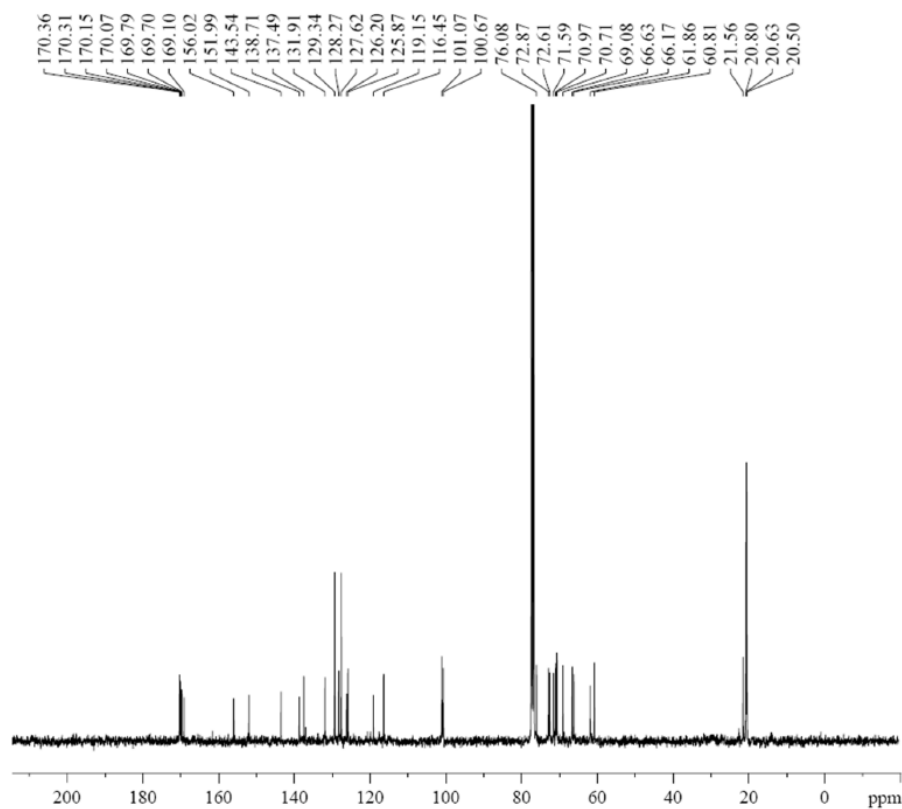 $^1\text{H}$  and  $^{13}\text{C}$  NMR spectra of compound **5w**

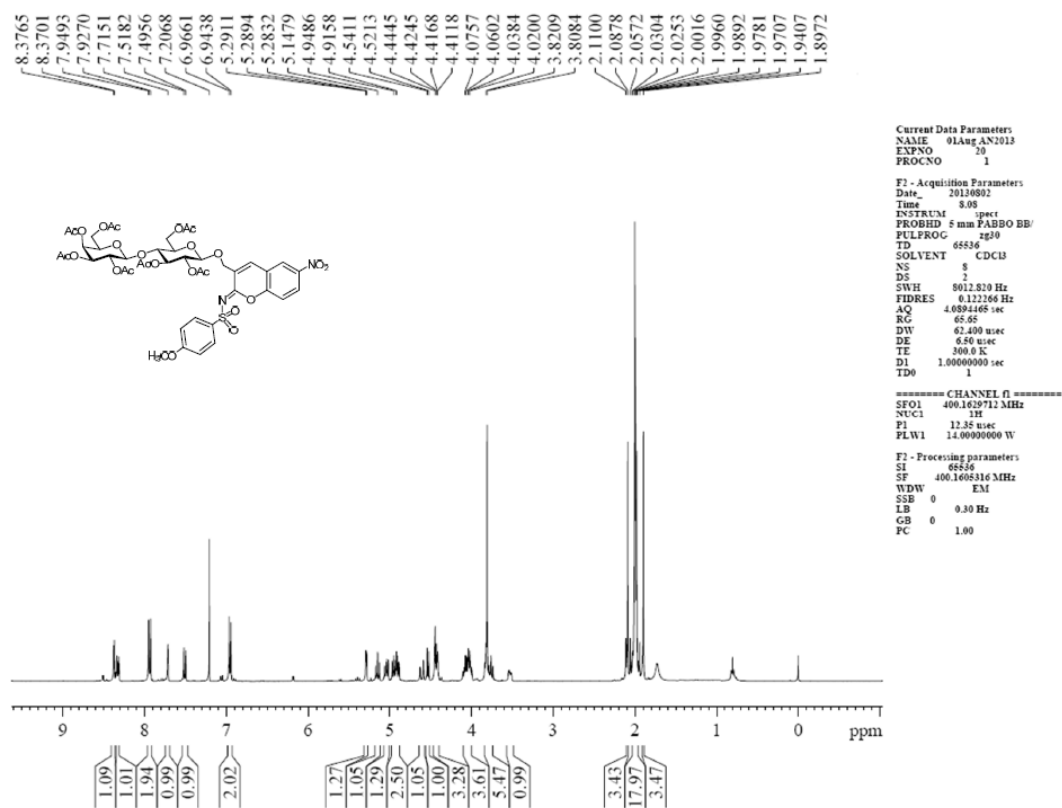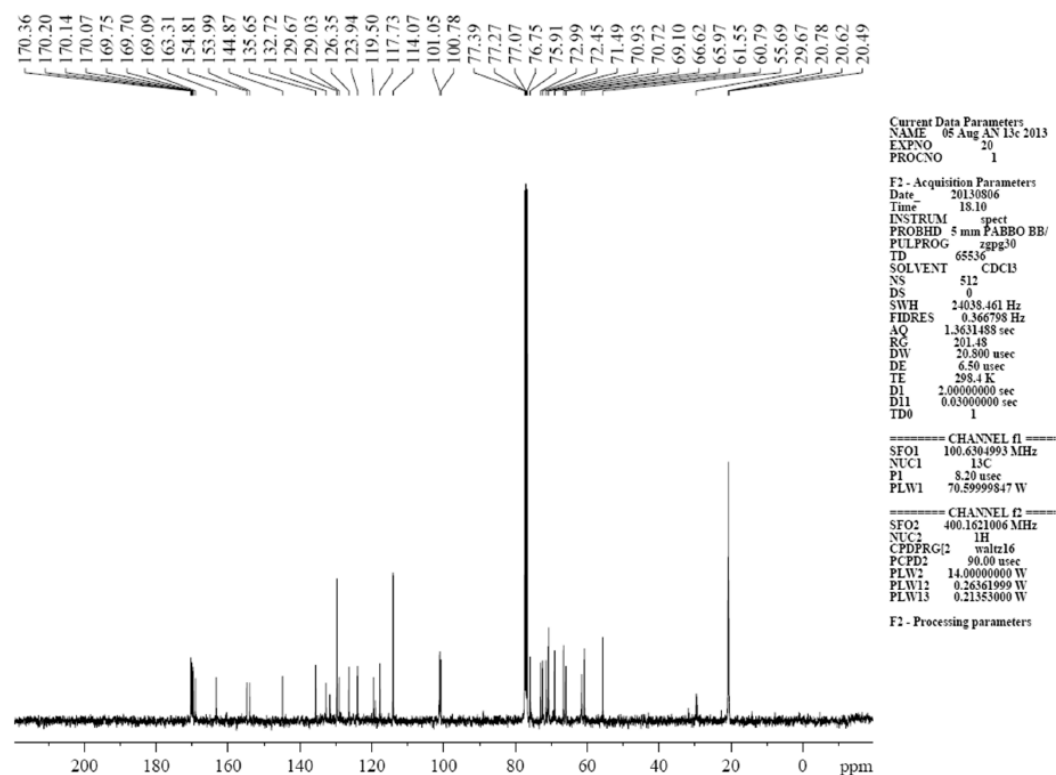

<sup>1</sup>H and <sup>13</sup>C NMR spectra of compound **5x**

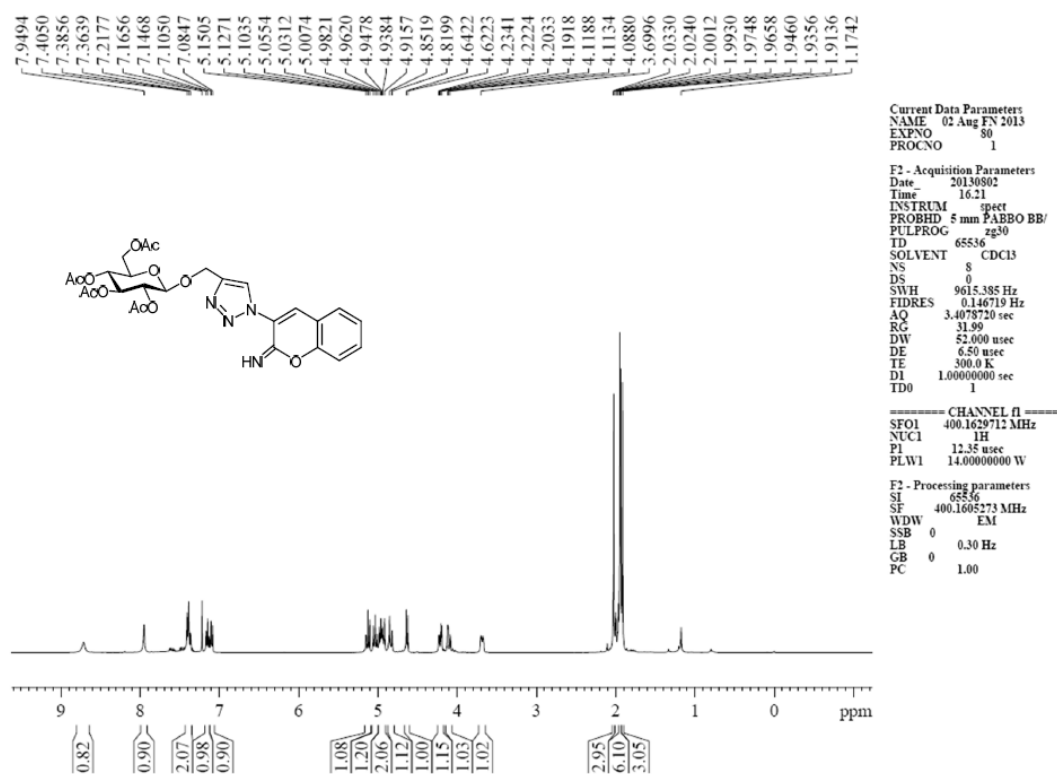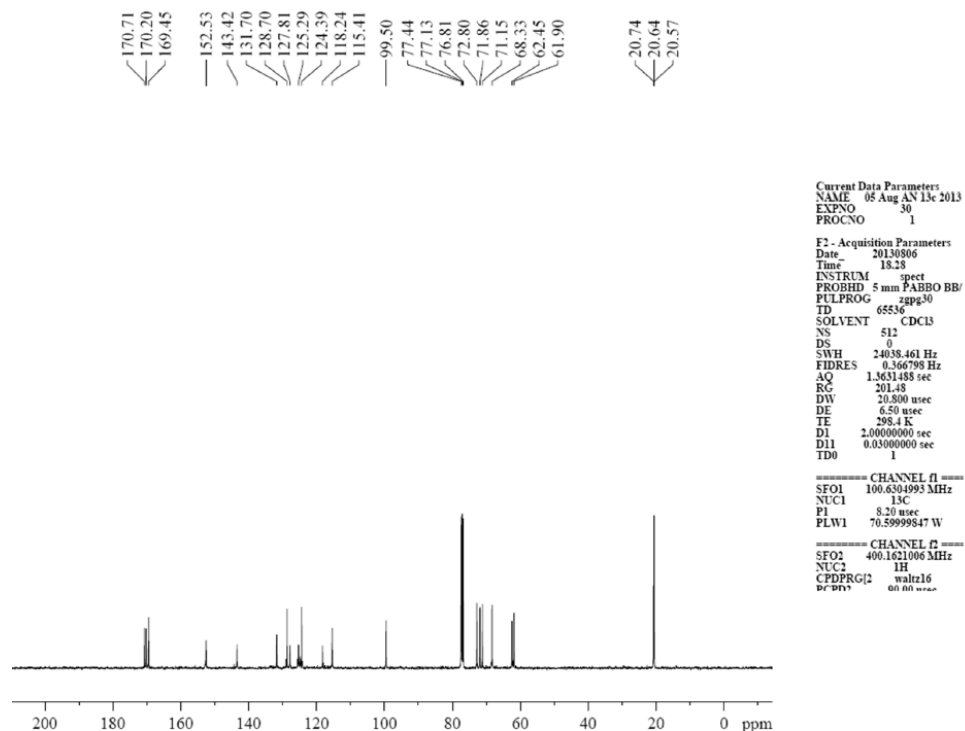<sup>1</sup>H and <sup>13</sup>C NMR spectra of compound **6a**

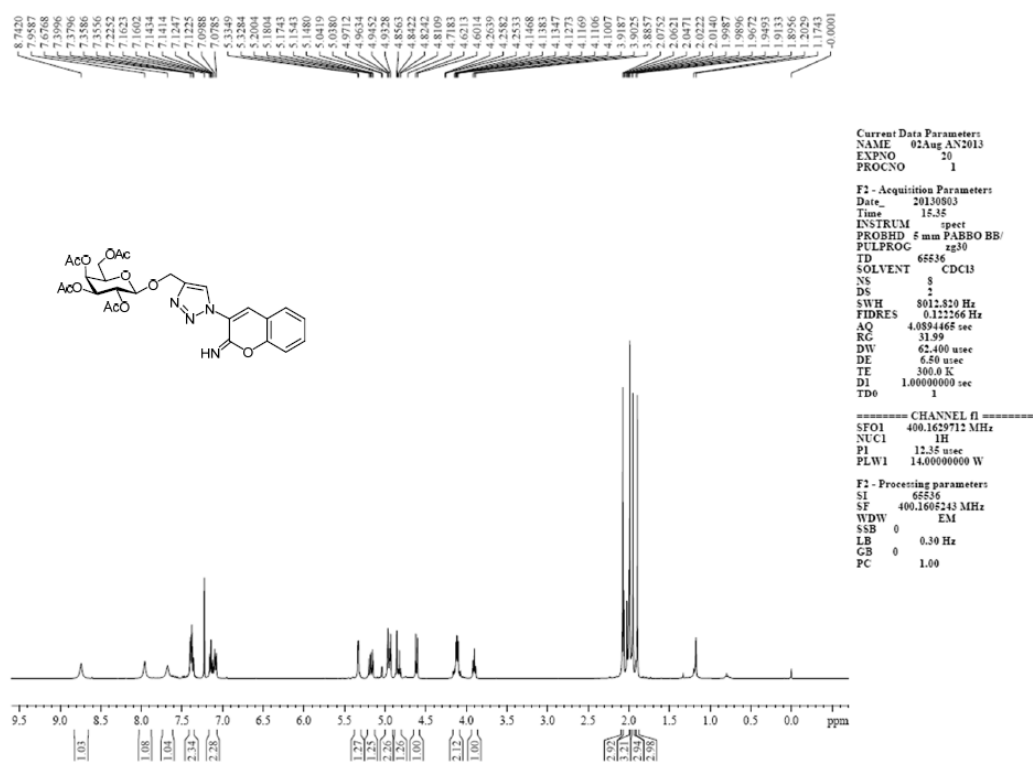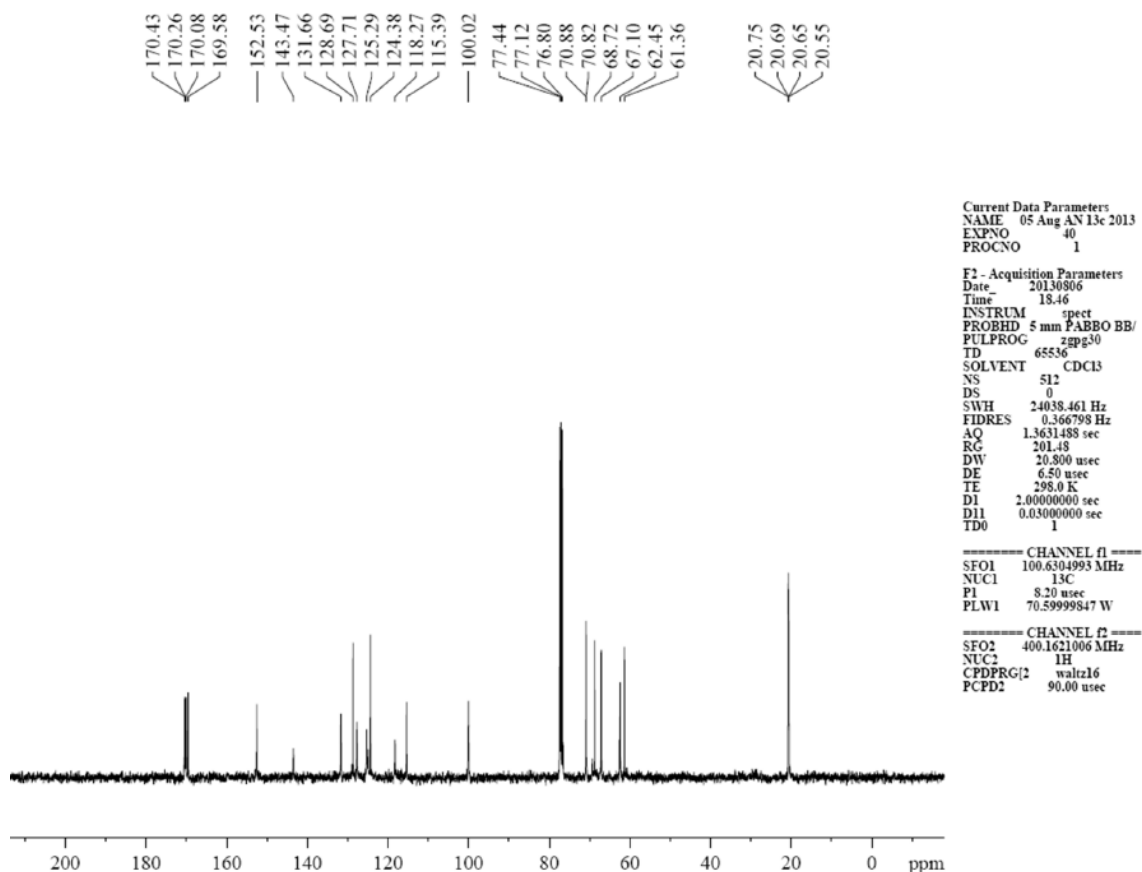

<sup>1</sup>H and <sup>13</sup>C NMR spectra of compound **6b**



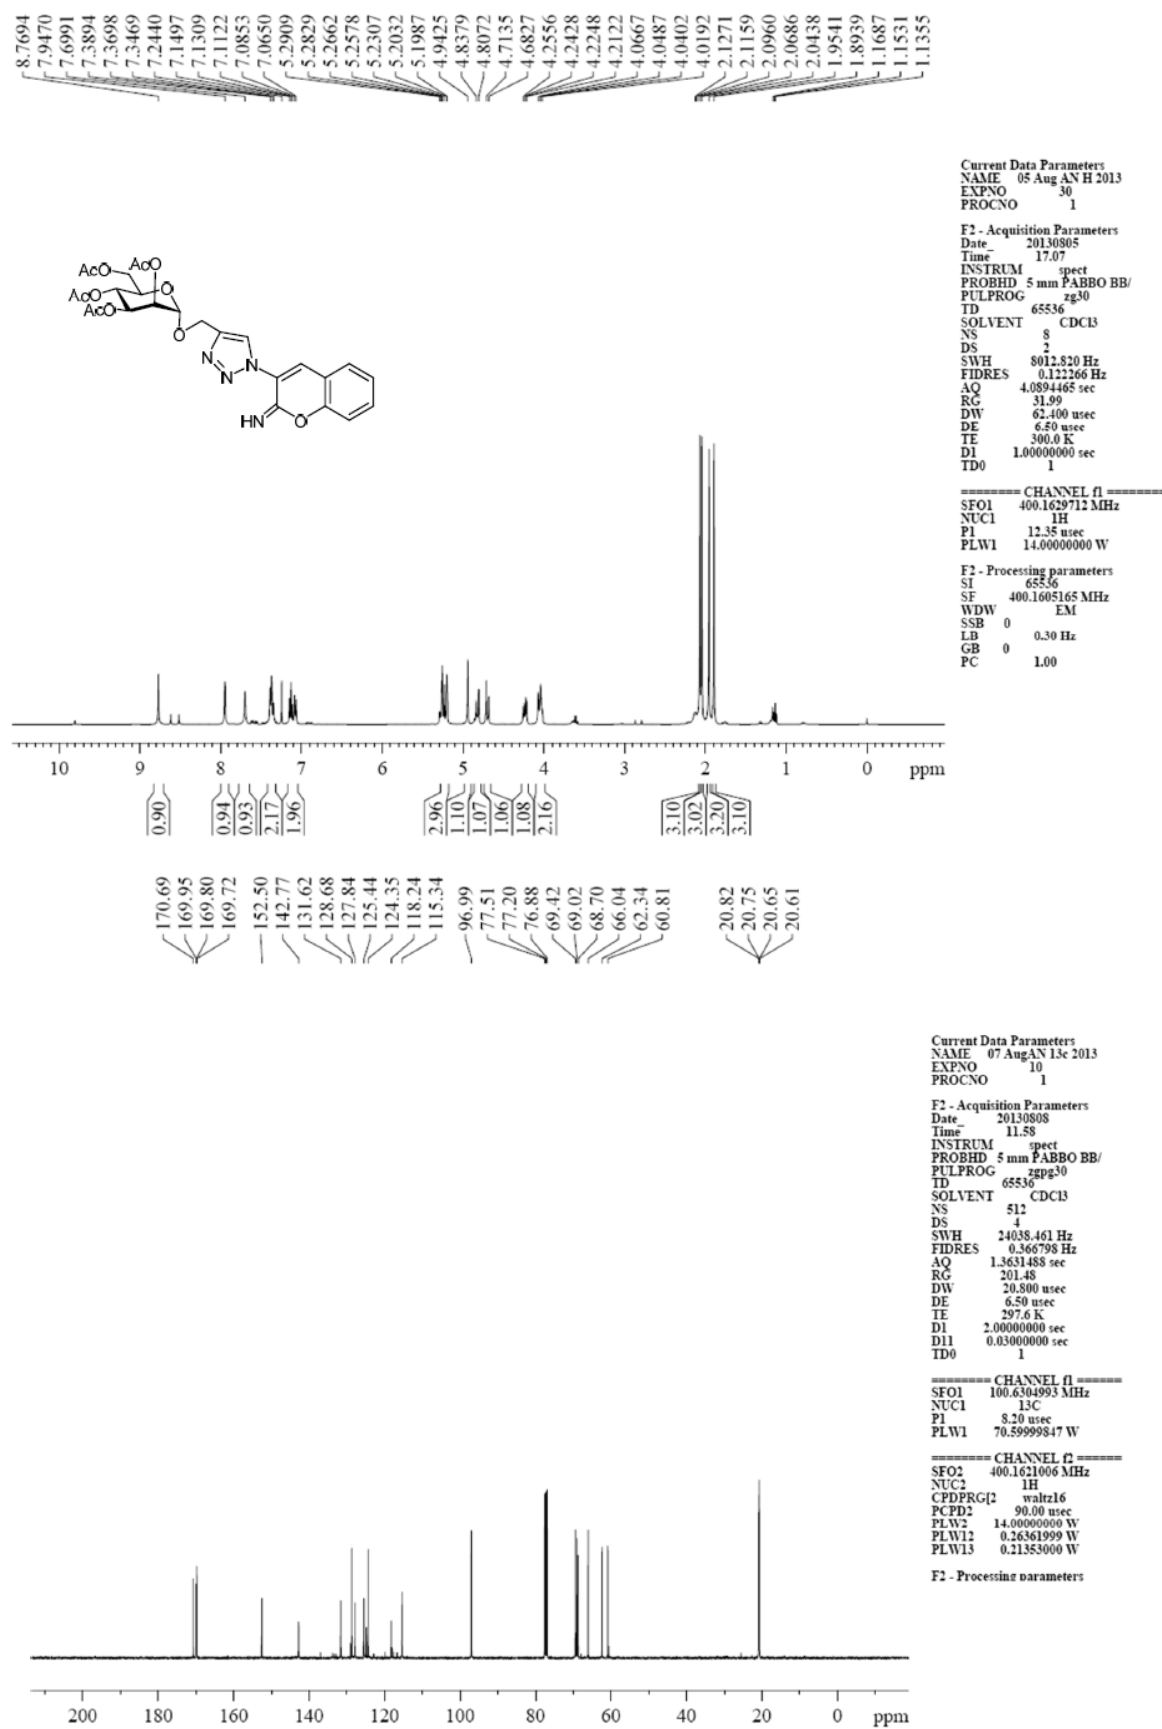

<sup>1</sup>H and <sup>13</sup>C NMR spectra of compound **6c**

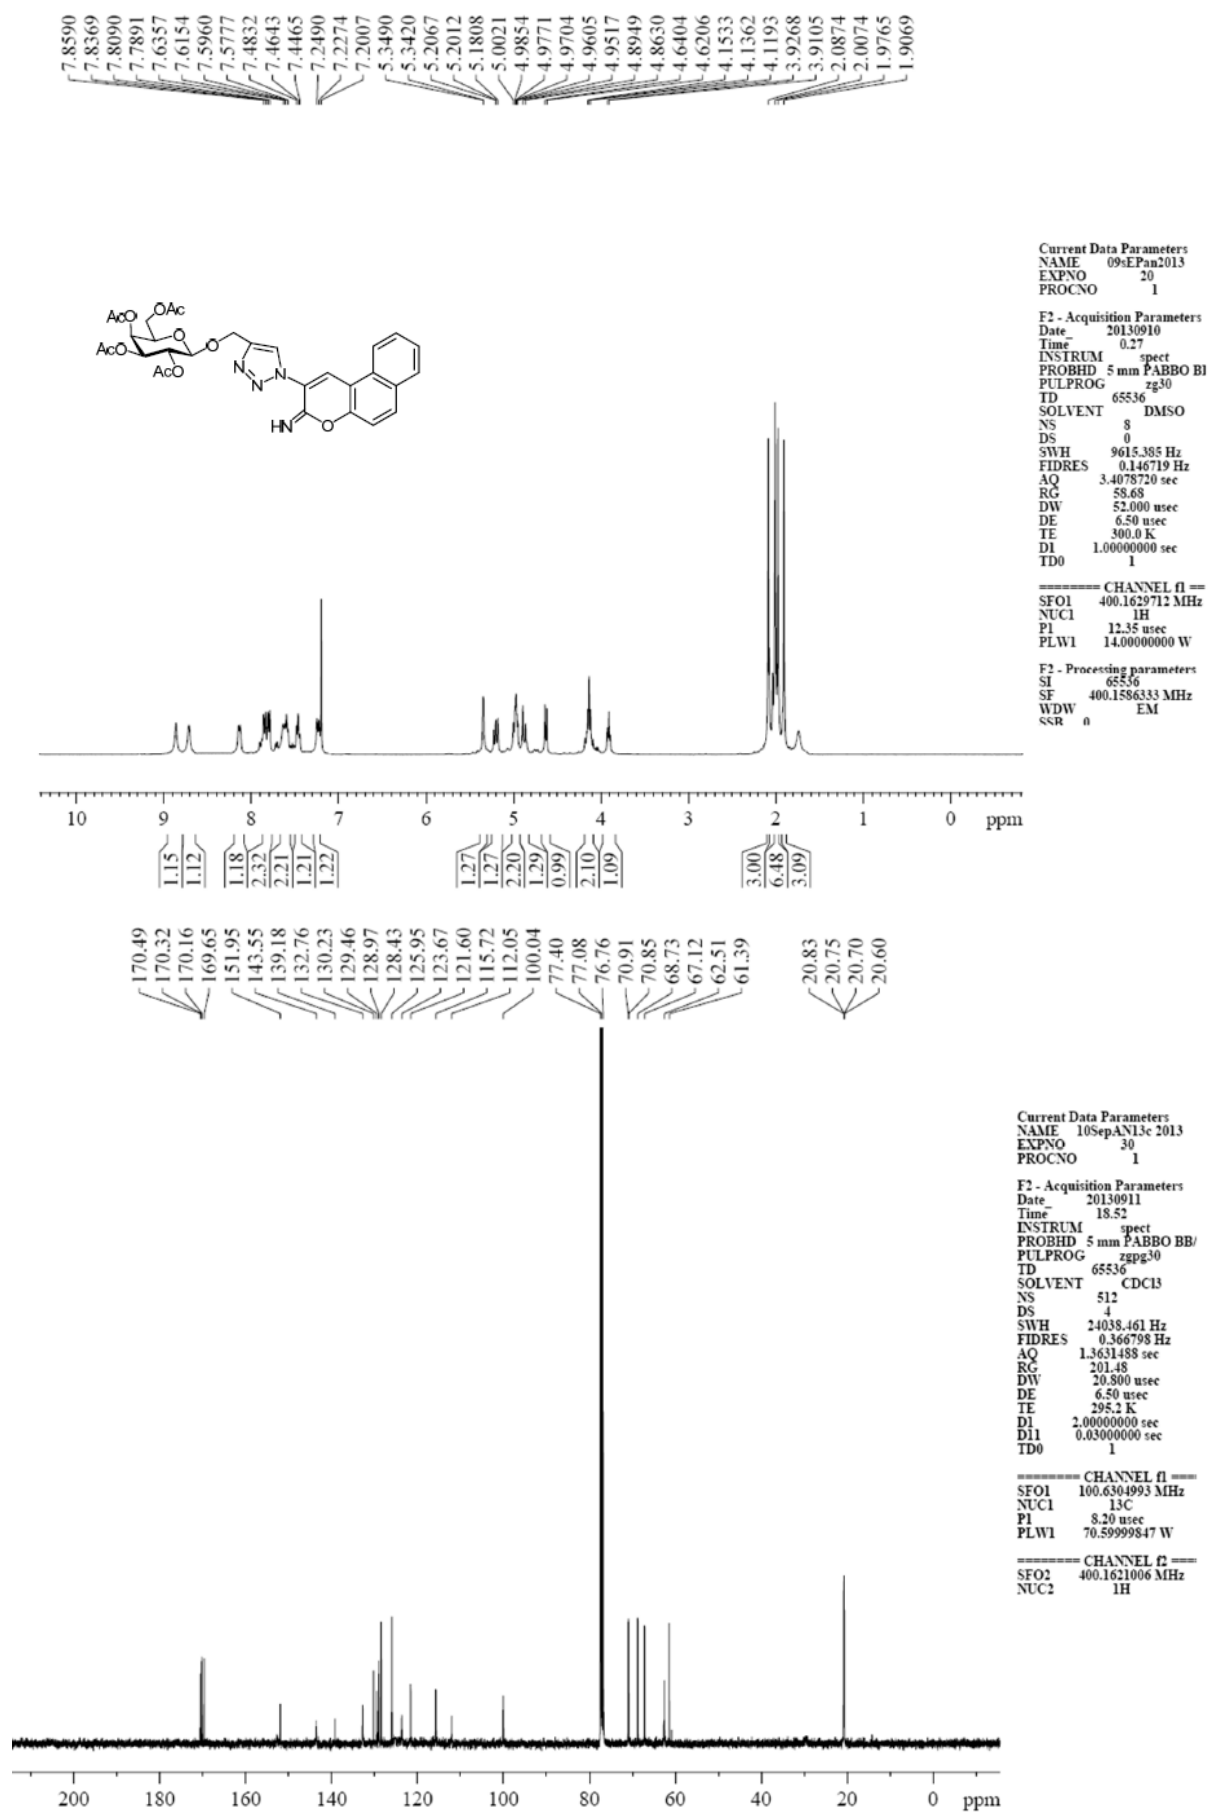

<sup>1</sup>H and <sup>13</sup>C NMR spectra of compound 6d



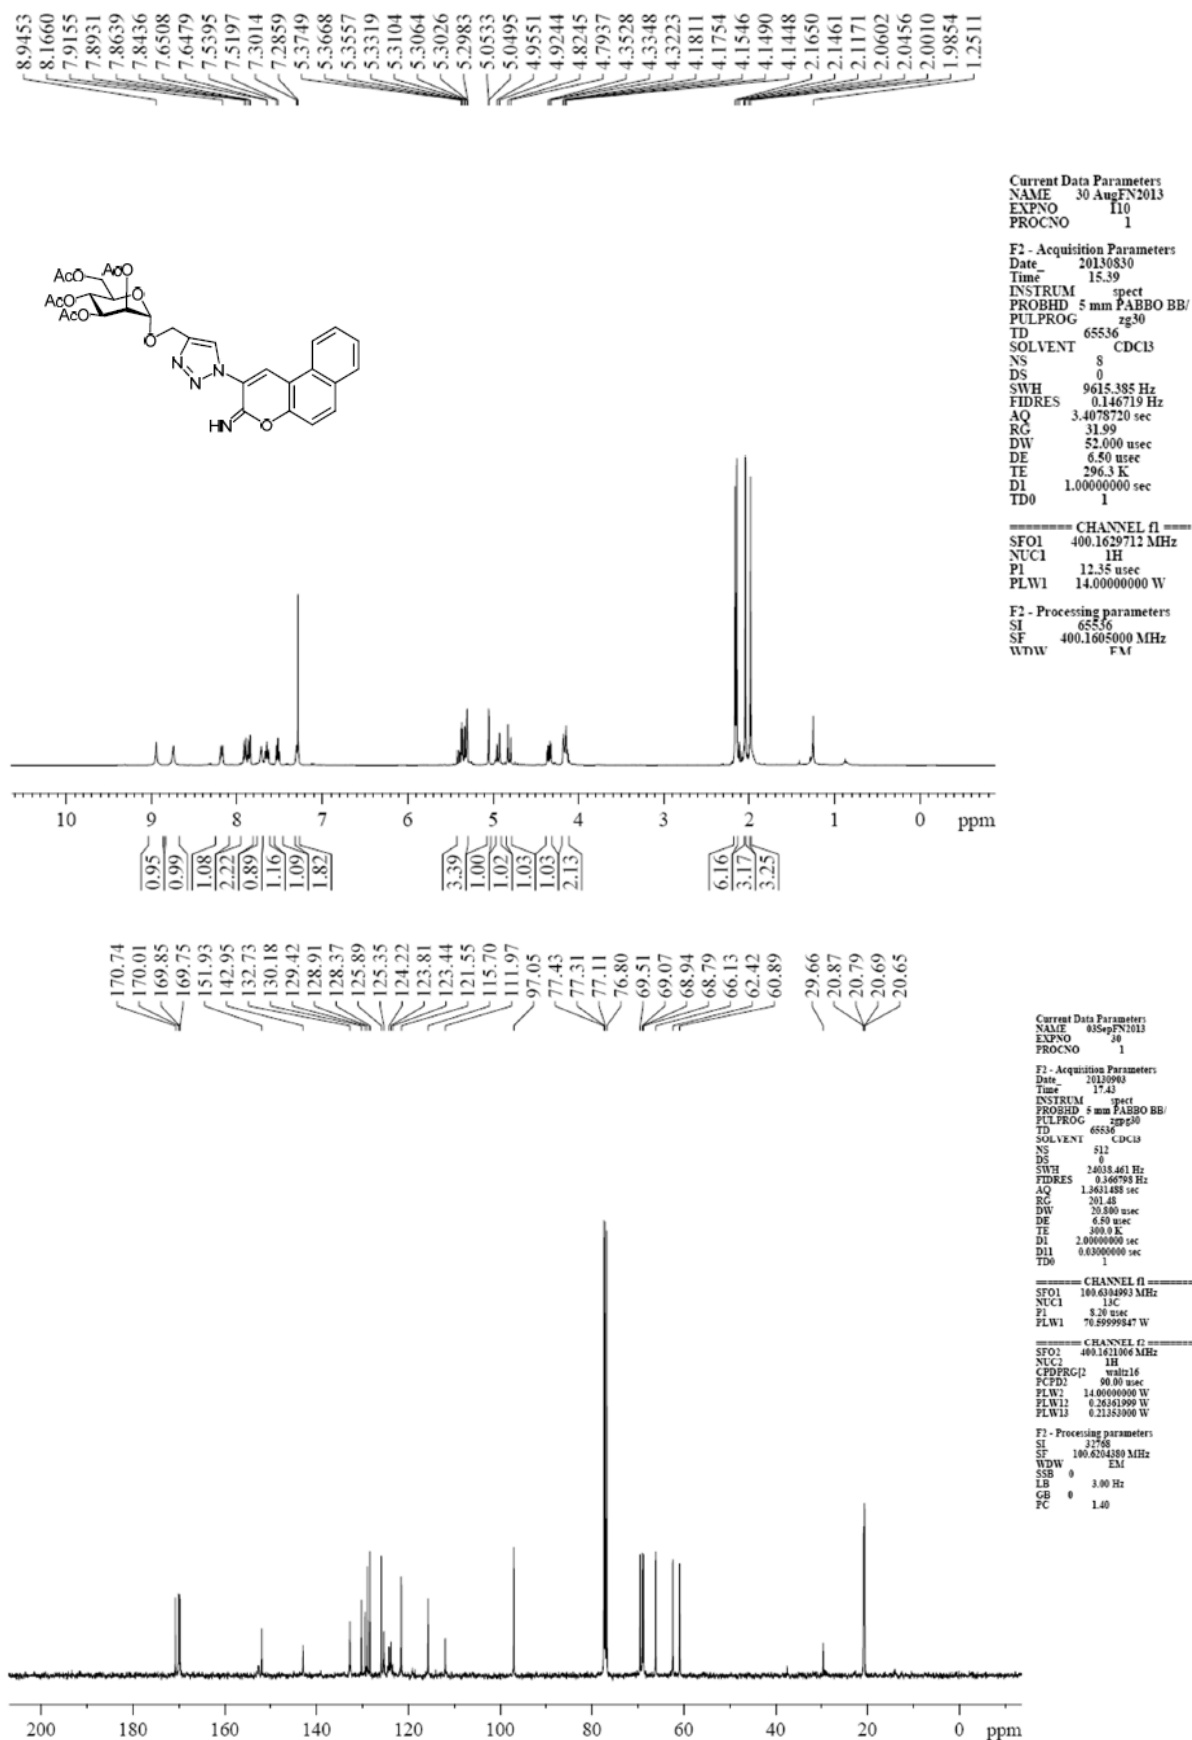

<sup>1</sup>H and <sup>13</sup>C NMR spectra of compound **6f**

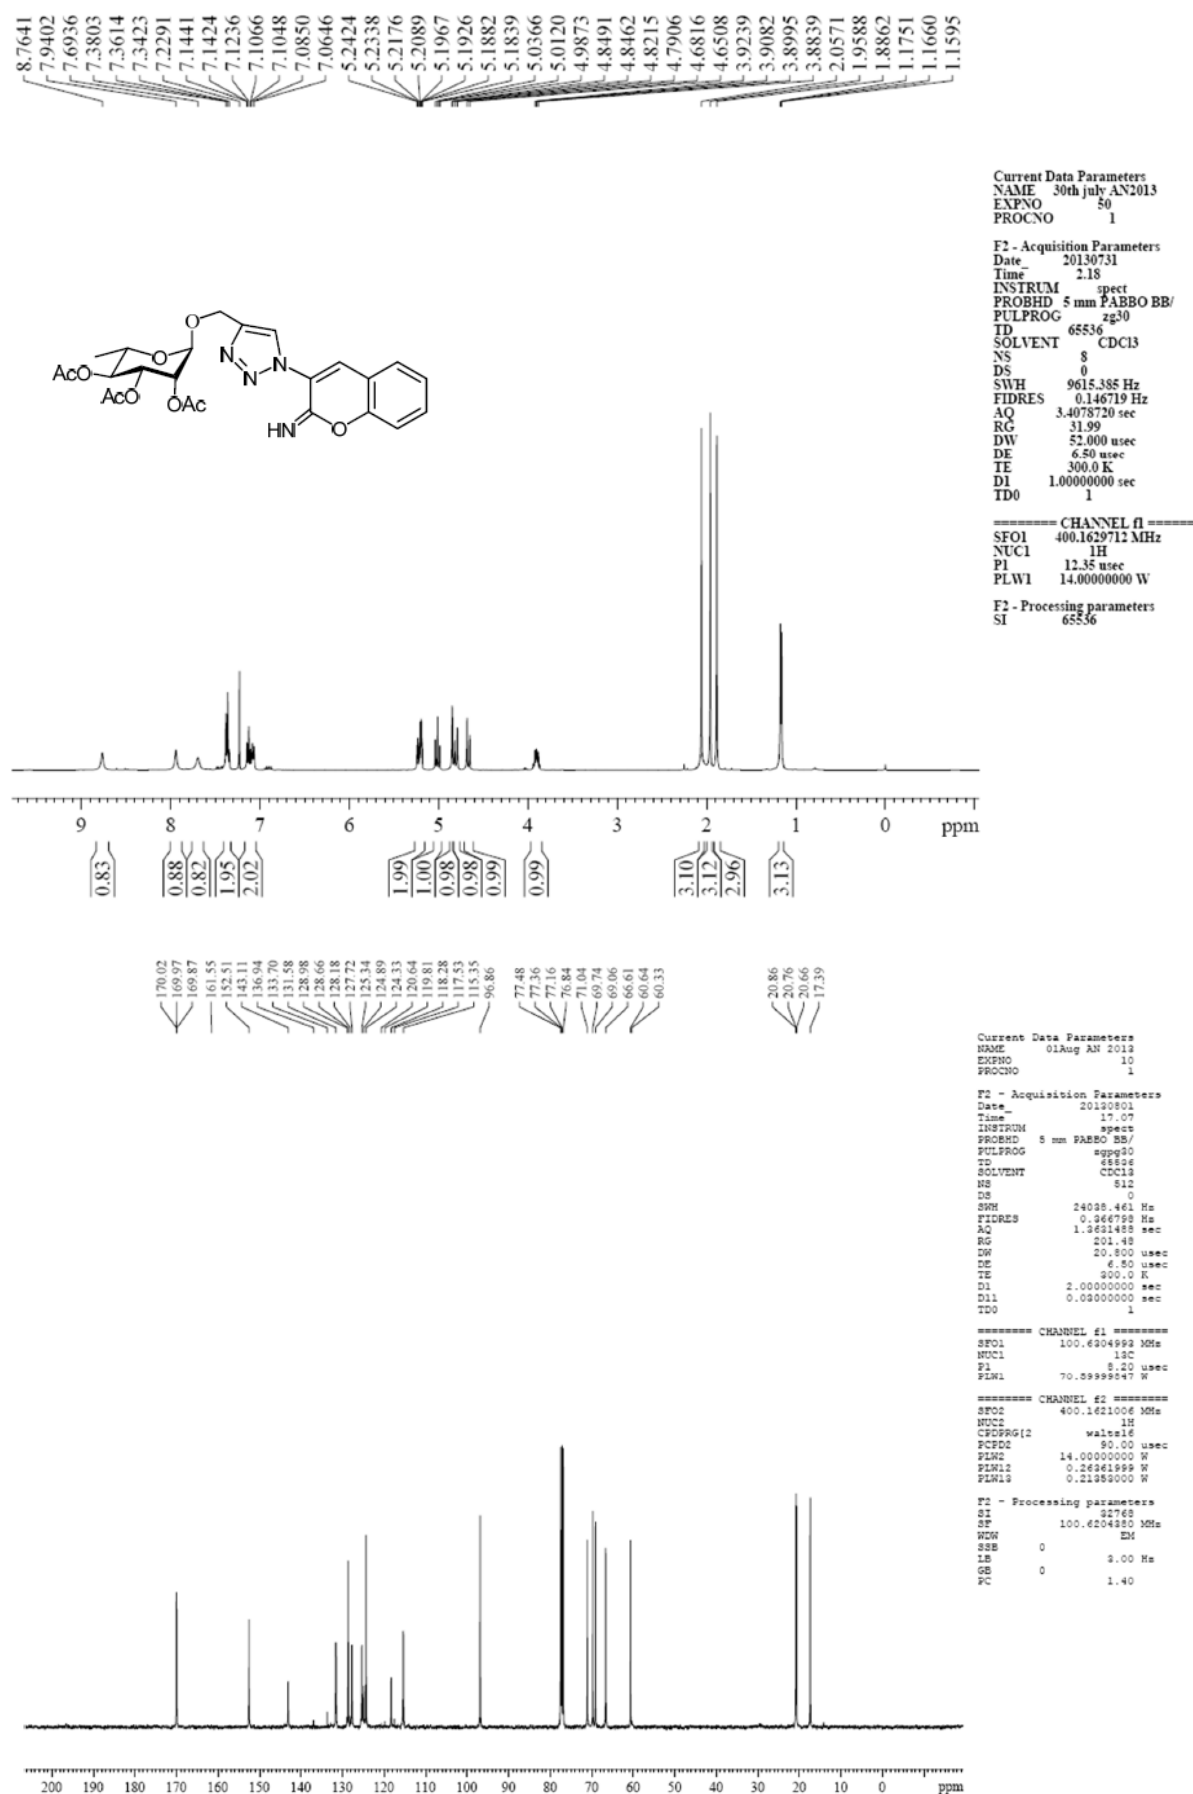

<sup>1</sup>H and <sup>13</sup>C NMR spectra of compound **6g**

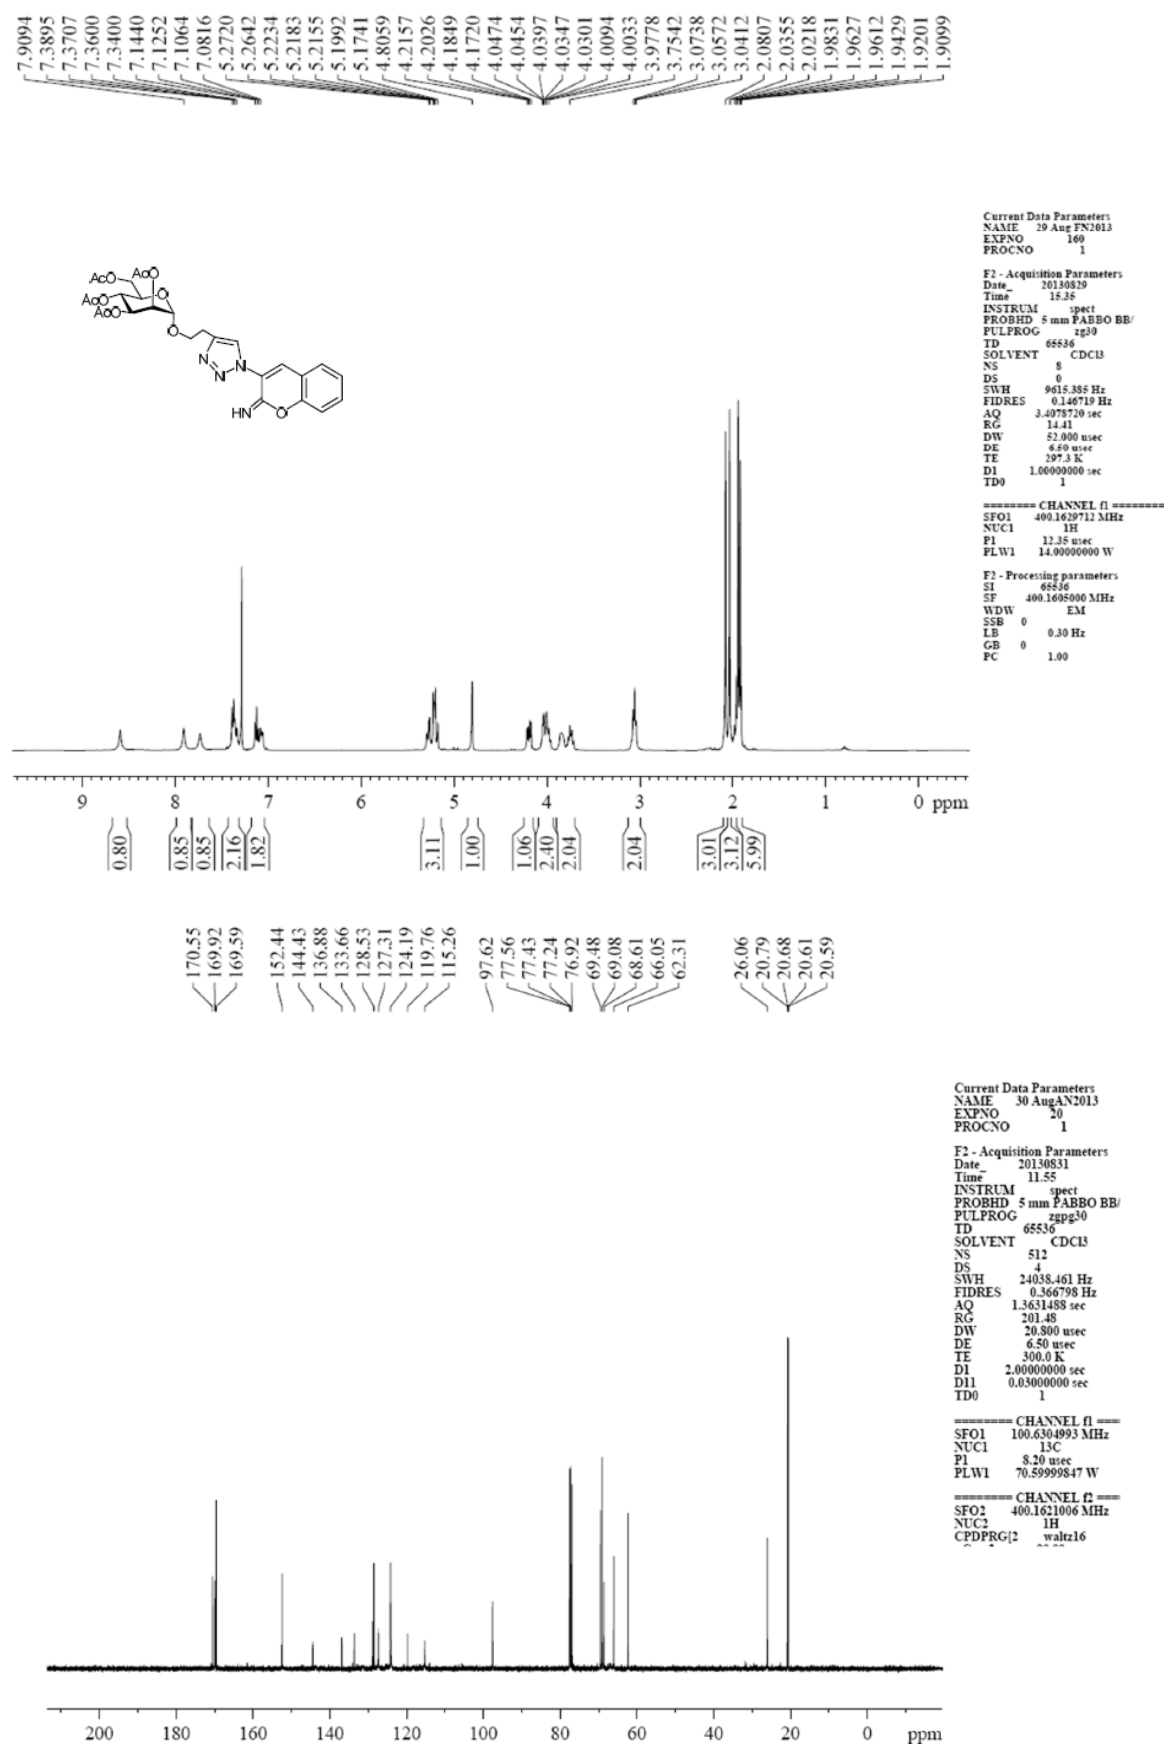

$^1\text{H}$  and  $^{13}\text{C}$  NMR spectra of compound **6h**

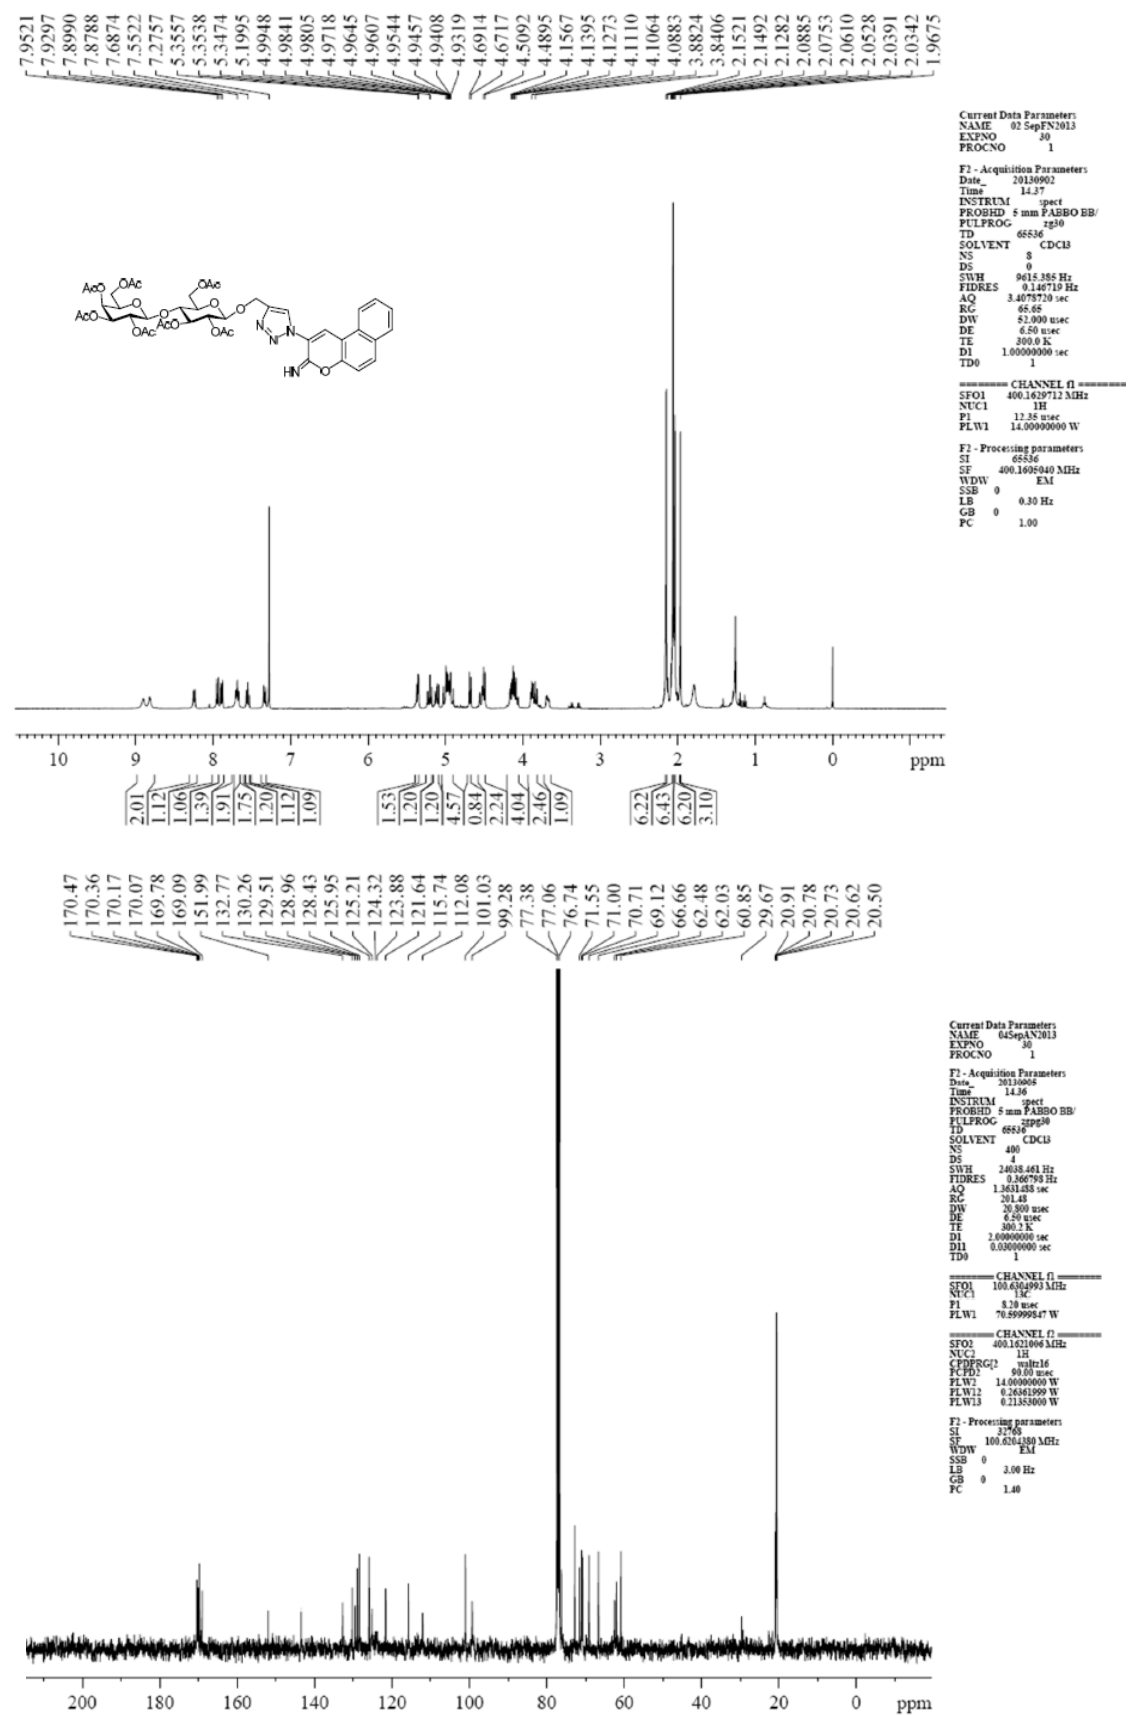

<sup>1</sup>H and <sup>13</sup>C NMR spectra of compound **6i**



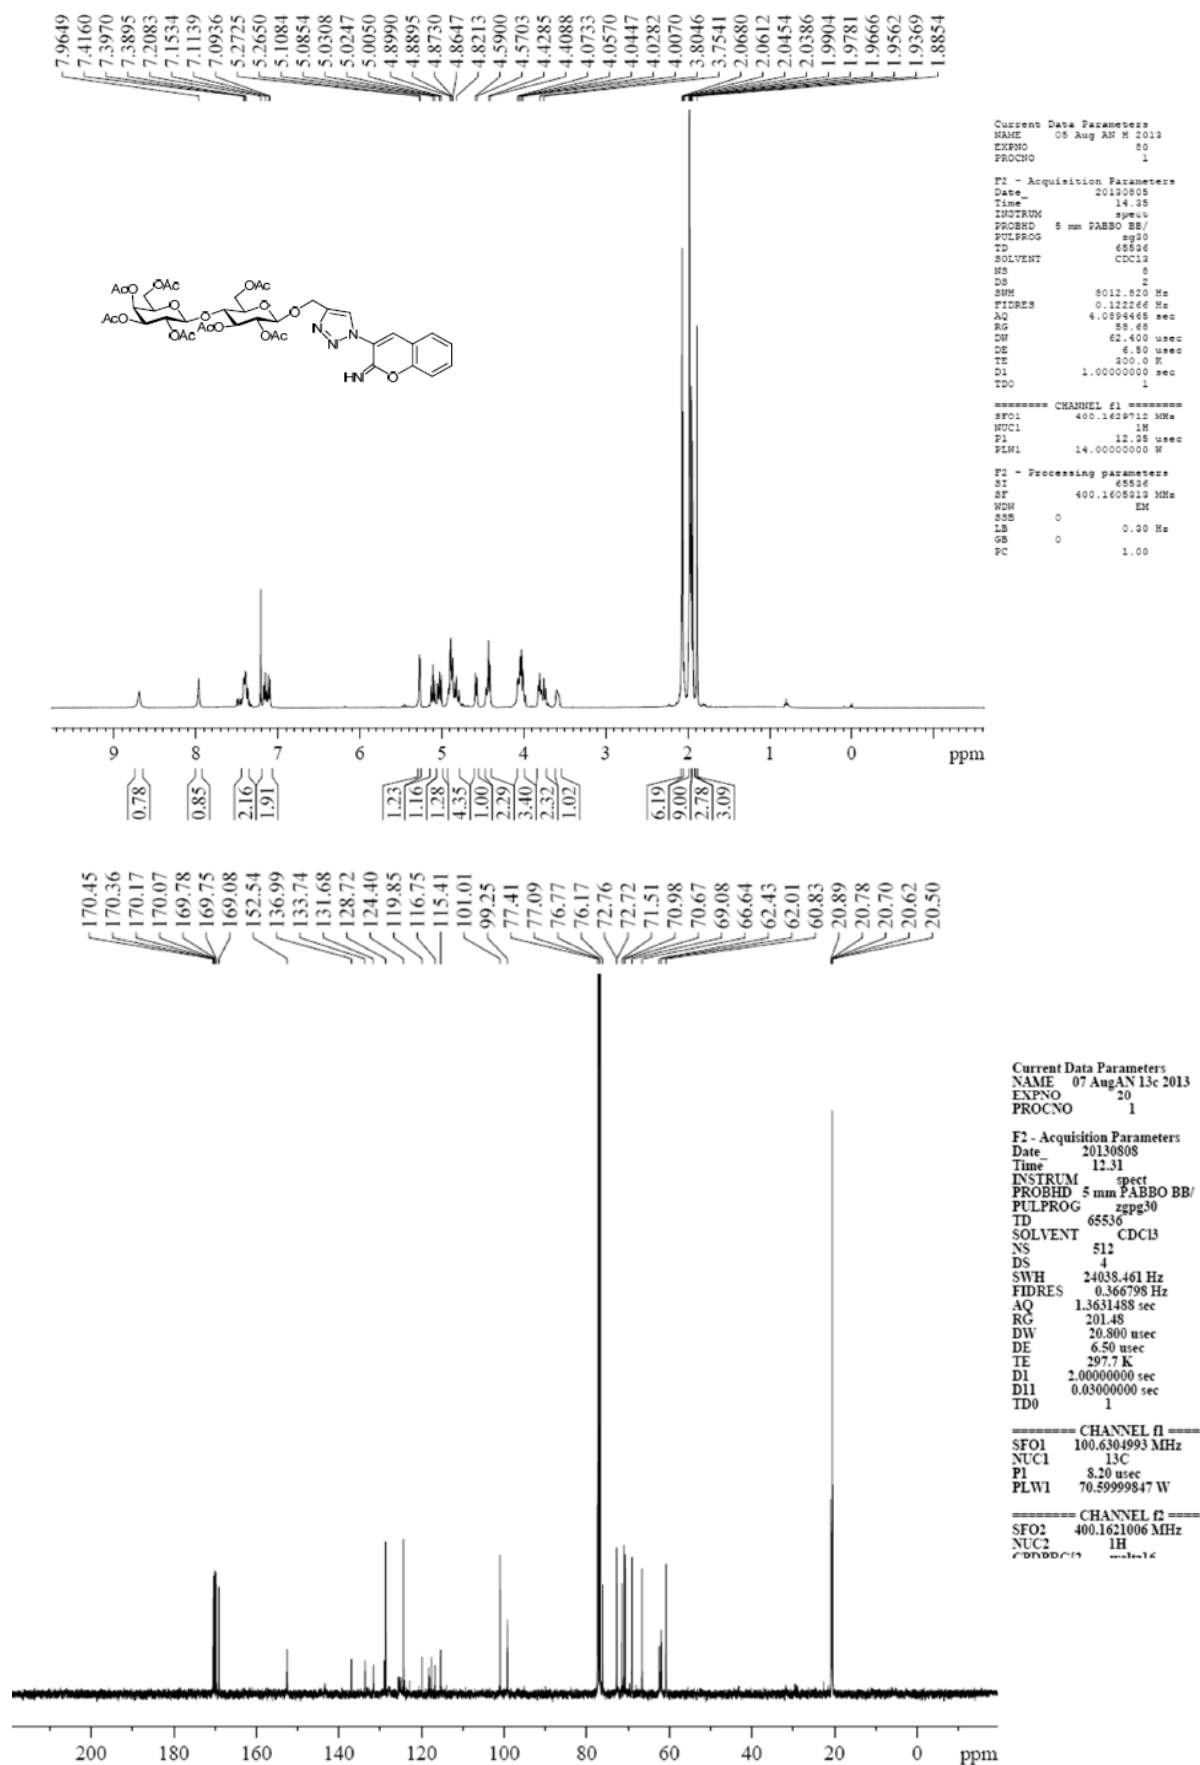

<sup>1</sup>H and <sup>13</sup>C NMR spectra of compound 6j



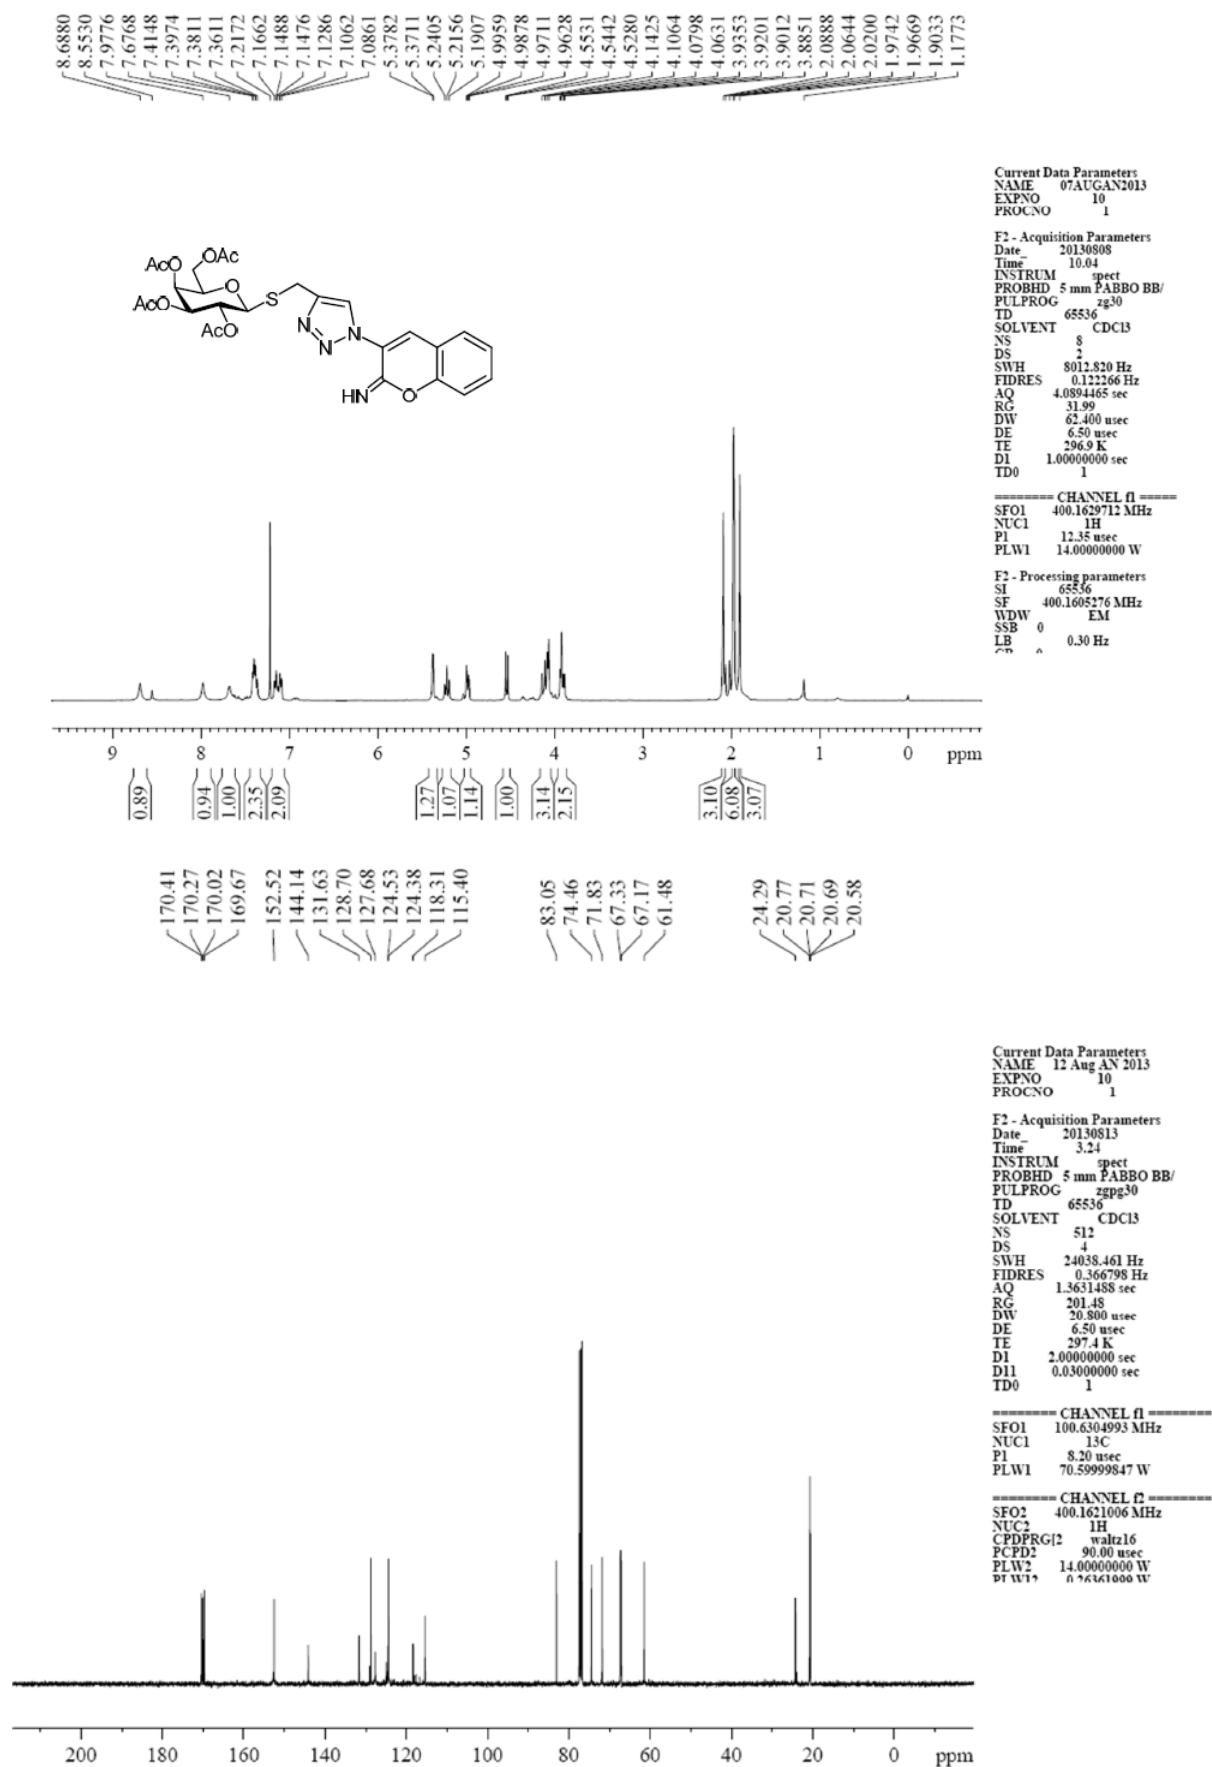

$^1\text{H}$  and  $^{13}\text{C}$  NMR spectra of compound **6k**

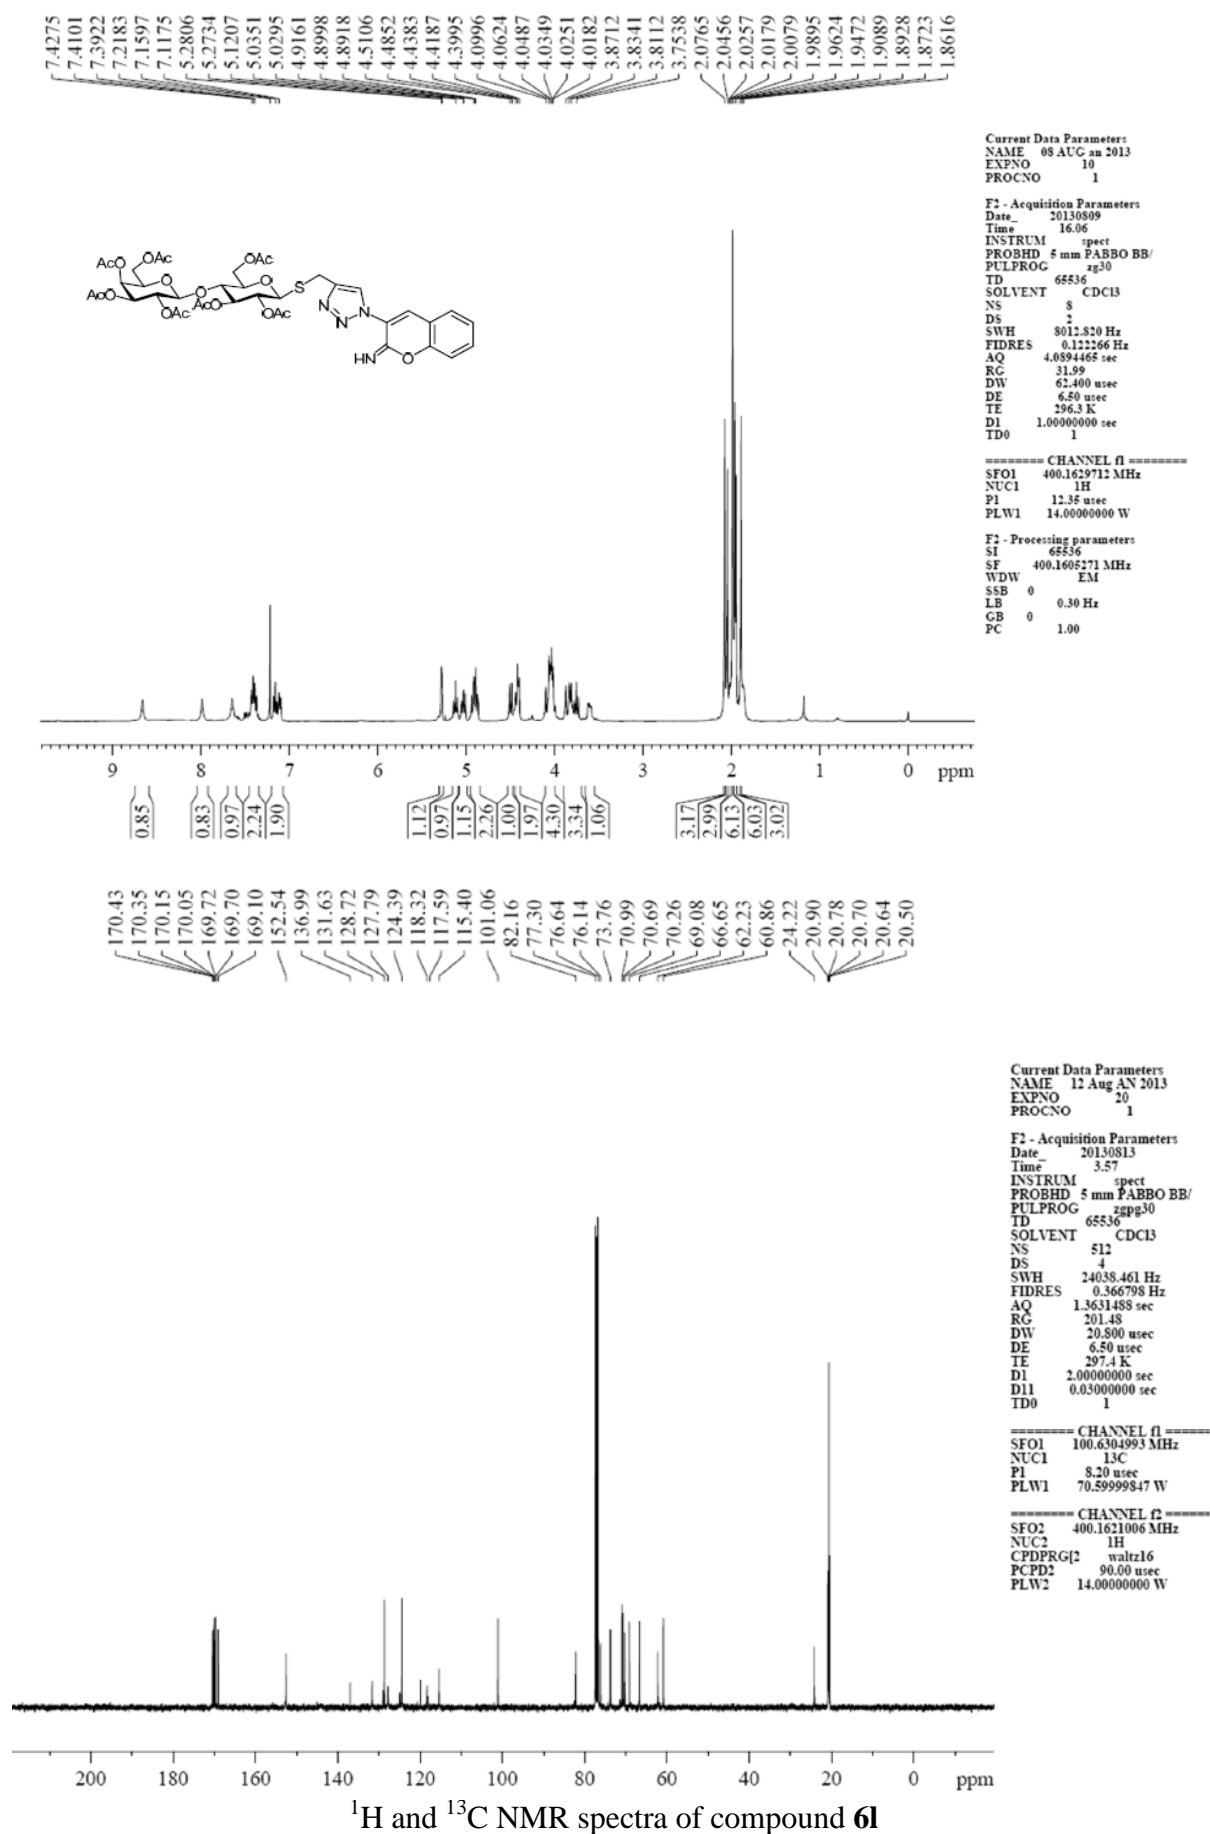

$^1\text{H}$  and  $^{13}\text{C}$  NMR spectra of compound **6l**

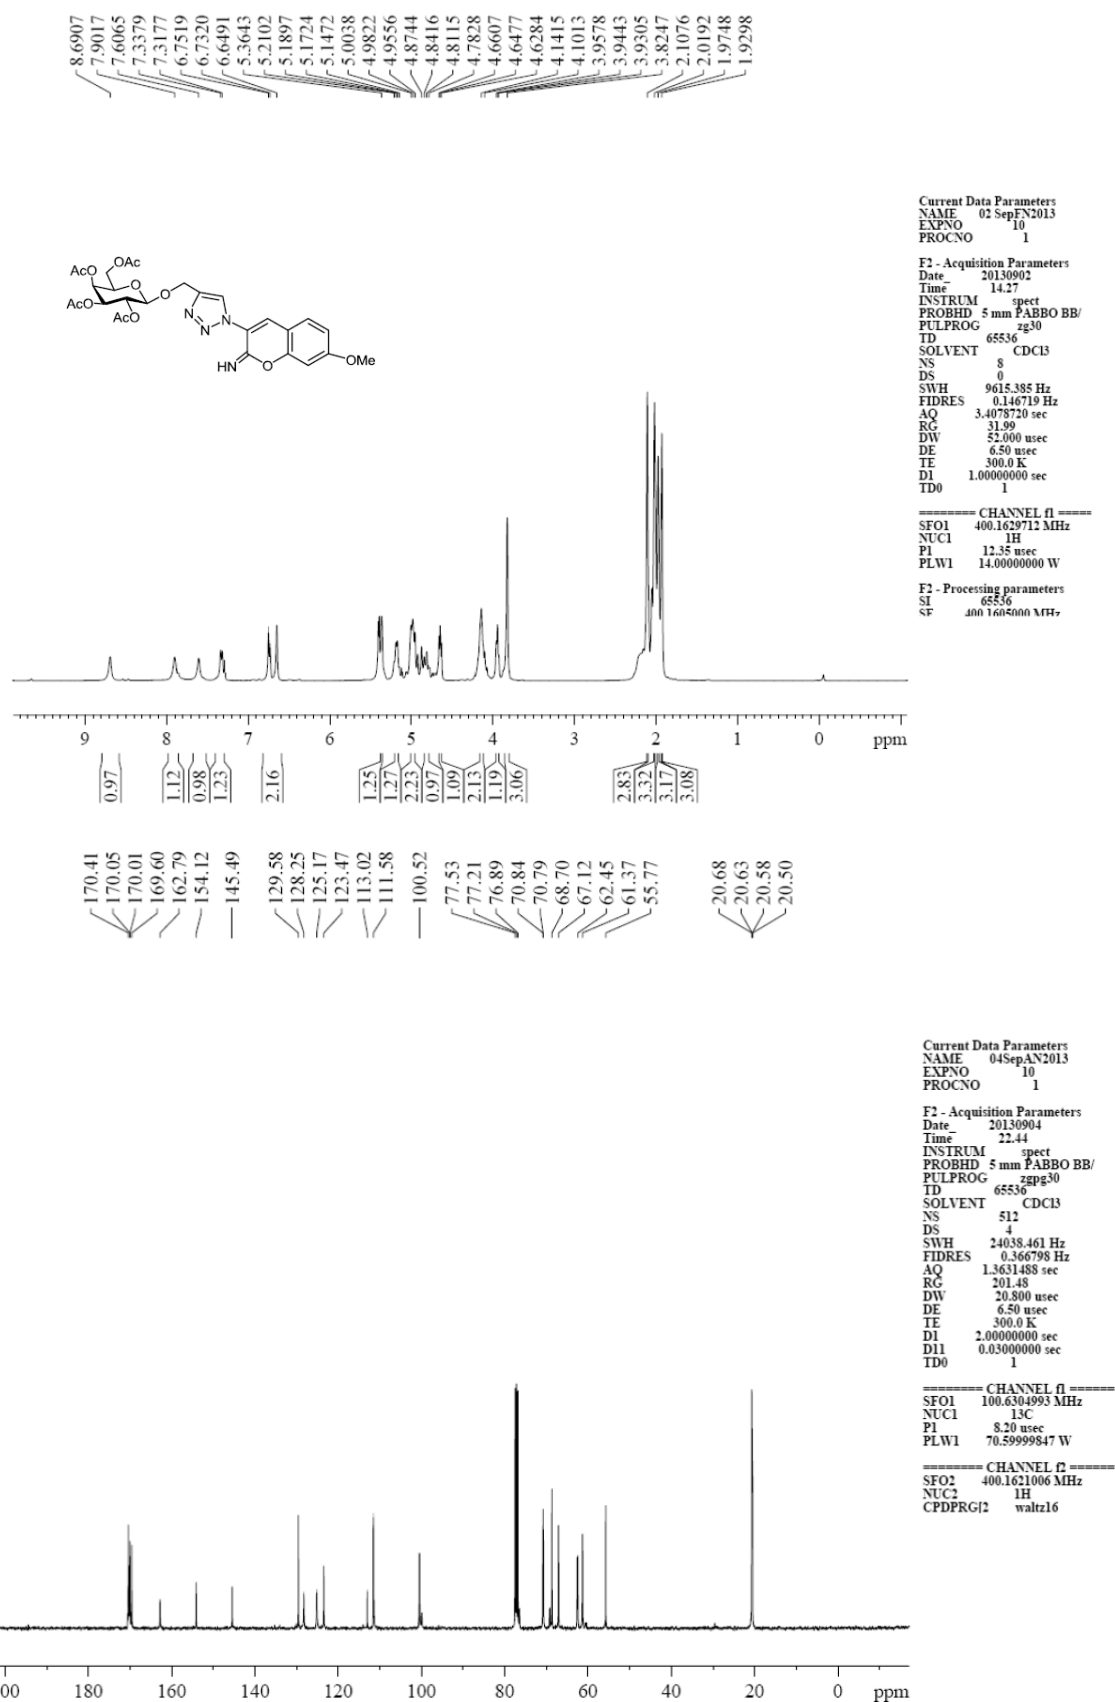

$^1\text{H}$  and  $^{13}\text{C}$  NMR spectra of compound **6m**

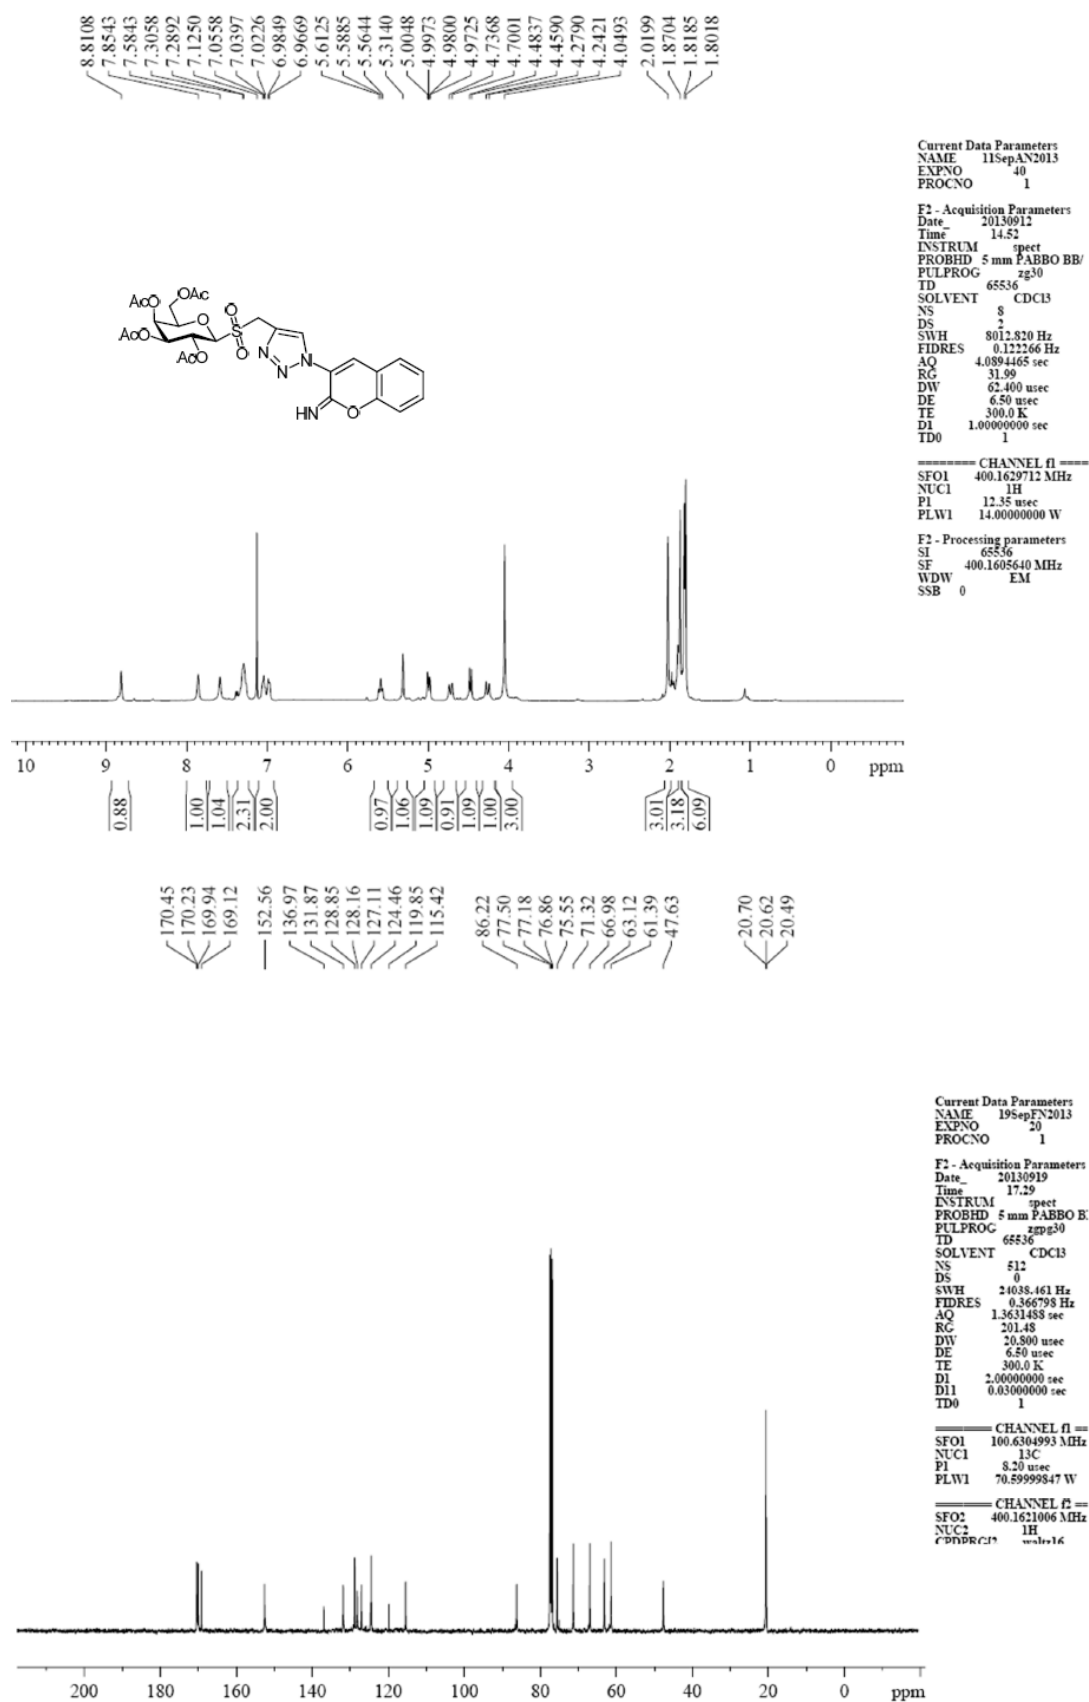

<sup>1</sup>H and <sup>13</sup>C NMR spectra of compound **6n**

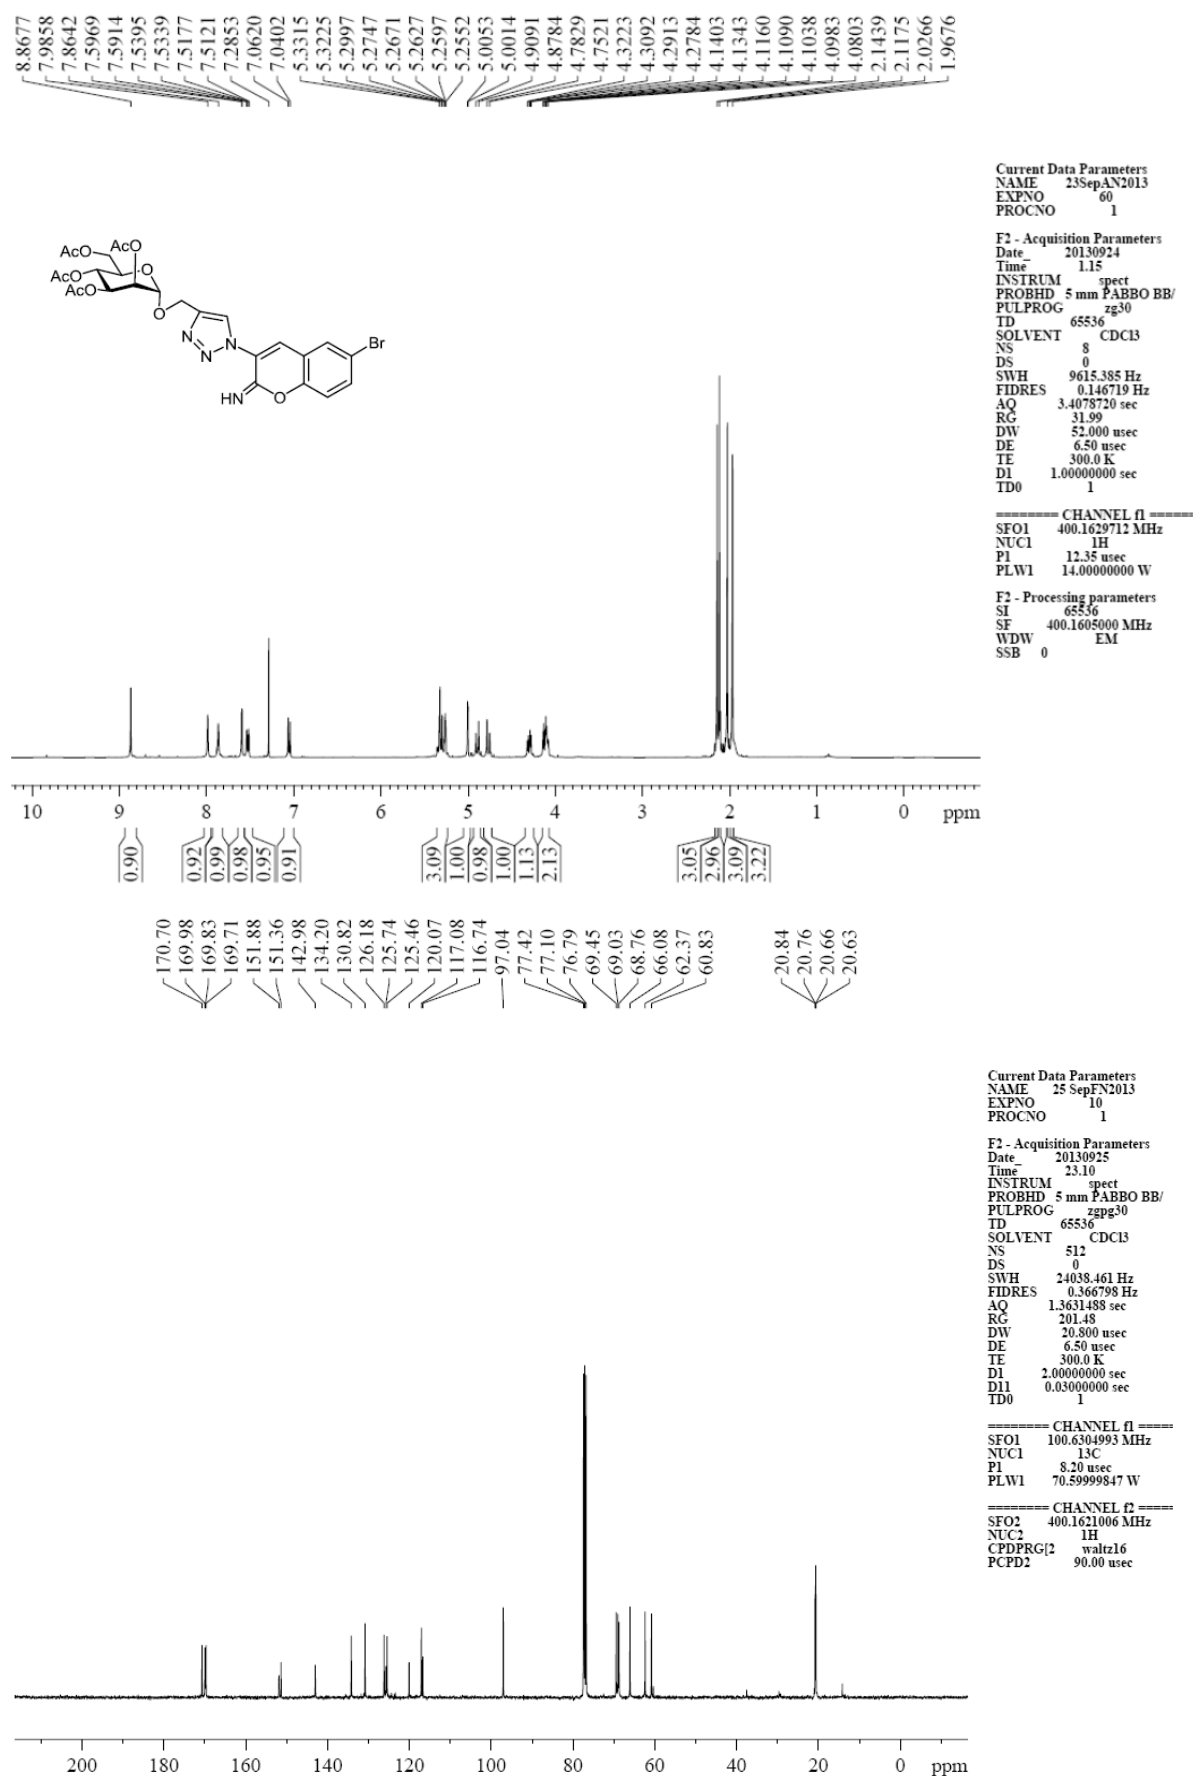

<sup>1</sup>H and <sup>13</sup>C NMR spectra of compound 60
